1 **Title**

2 Control of stem-cell niche establishment in Arabidopsis flowers by REVOLUTA and  
3 the LEAFY-RAX1 module

4 **Authors**

5 Denay Grégoire<sup>1,2,\*</sup>, Tichtinsky Gabrielle<sup>1</sup>, Le Masson Marie<sup>1</sup>, Chahtane Hicham<sup>1,§</sup>,  
6 Huguet Sylvie<sup>3,4</sup>, Lopez-Vidriero Irene<sup>6</sup>, Wenzl Christian<sup>5</sup>, Franco-Zorrilla José  
7 Manuel<sup>6</sup>, Simon Rüdiger<sup>2</sup>, Lohmann Jan U.<sup>5</sup>, and Parcy François<sup>1,\*</sup>

8 **Affiliations**

9 1 - Univ. Grenoble Alpes, CNRS, CEA, INRA, BIG-LPCV, 38000 Grenoble, France

10 2 - Institute for Developmental Genetics, Heinrich Heine University, Düsseldorf,  
11 Germany.

12 3 - Institute of Plant Sciences Paris Saclay IPS2, CNRS, INRA, Université Paris-Sud,  
13 Université Evry, Université Paris-Saclay, Bâtiment 630, 91405 Orsay, France.

14 4 - Institute of Plant Sciences Paris-Saclay IPS2, Paris Diderot, Sorbonne Paris-Cité,  
15 Bâtiment 630, 91405, Orsay, France.

16 5 - Centre for Organismal Studies, Heidelberg University, Heidelberg, Baden-  
17 Württemberg, Germany.

18 6 - Genomics Unit, Centro Nacional de Biotecnología, Consejo Superior de  
19 Investigaciones Científicas, 28049 Madrid, Spain.

20 **Additional Footnotes**

21 § - Present address: Department of Plant Biology, University of Geneva, 30 Quai  
22 Ernest-Ansermet-Sciences III, 1211, Geneva 4, Switzerland.

23 \* - Corresponding authors: [francois.parcy@cea.fr](mailto:francois.parcy@cea.fr); [gregoire.denay@hhu.de](mailto:gregoire.denay@hhu.de)

24

25 **Abstract**

26 Plants retain the ability to produce organs throughout their life by maintaining active  
27 stem cell niches called meristems. The shoot apical meristem (SAM) is responsible  
28 for the growth of aerial plant structures. In *Arabidopsis thaliana*, the SAM initially  
29 produces leaves during the vegetative phase and later flowers during reproductive  
30 development. In the early stages of floral initiation, a group of cells first emerges from  
31 the SAM to form a stereotypically organized meristematic structure on its flank.  
32 However, the molecular mechanisms underlying the acquisition of this specific  
33 meristematic organization remain elusive. We show here that the transcription factors  
34 LEAFY (LFY) and REVOLUTA (REV) control two partially redundant pathways  
35 controlling meristematic organization in early flower primordia. We found that LFY  
36 acts through the transcription factor REGULATOR OF AXILLARY MERISTEM1  
37 (RAX1) and we provide mechanistic insights in how RAX1 allows meristem identity  
38 establishment in young flowers. Our work provides a molecular link between the  
39 processes of meristem formation and floral identity acquisition in the nascent flower.

40

## 41 Introduction

42 Plants retain the capacity to initiate new organs throughout their life. To this end, they  
43 maintain self-sustaining pools of stem cells in organized niches called meristems.  
44 The SAM gives rise to most post-embryonic aerial organs thanks to stem cells  
45 present in its central zone (CZ). These cells are maintained in an undifferentiated  
46 state by a genetic network including the two transcription factors (TF) WUSCHEL  
47 (WUS) and SHOOTMERISTEMLESS (STM). WUS is expressed in the organizing  
48 centre (OC) of the SAM, located a below the CZ where it migrates to repress cell  
49 differentiation programs (Mayer et al., 1998; Yadav et al., 2011, 2013, 2010). STM is  
50 widely expressed in the SAM and acts at least in part *via* the regulation of the CK  
51 levels (Endrizzi et al., 1996; Jasinski et al., 2005; Lenhard et al., 2002; Yanai et al.,  
52 2005). Maintenance of the stem cell pool in the SAM involves a regulatory feedback  
53 loop between WUSCHEL (WUS) and the CLAVATA (CLV) signalling module (Schoof  
54 et al., 2000; Gaillochet et al., 2015; Brand et al., 2000). WUS induces the expression  
55 of the stem cell marker *CLAVATA3 (CLV3)* in the CZ (Brand et al., 2002). *CLV3*  
56 encodes a signalling peptide that binds its CLV1 receptor in the cells surrounding the  
57 OC (Ogawa et al., 2008), leading to negative regulation of WUS (Brand et al., 2000).  
58 This regulatory loop controls stem cell homeostasis by regulating the size of the stem  
59 cell niche. CK is also important for meristem maintenance by regulating both *WUS*  
60 and *CLV3* expression and promoting stemness (Zhao et al., 2010; Gordon et al.,  
61 2009). In the peripheral zone of the SAM, primordia develop as leaves during the  
62 vegetative phase and as flowers after floral transition at sites primarily determined by  
63 auxin maxima. Both leaf and flower primordia initiation require an initial  
64 downregulation of the *KNOX* genes *STM* and *KNAT1*. However, during flower  
65 development, expression of *KNOX* and of genes controlling stem cell fate such as  
66 *WUS* and *CLV3* are regained at a later stage. Indeed, at stage 2 (referred to here as  
67 flower meristem, FM), the flower primordia become patterned with distinct  
68 meristematic domains: they acquire *WUS* expression domain, marking the  
69 establishment of the OC, closely followed by that of *CLV3* marking the CZ, and of  
70 *UNUSUAL FLORAL ORGANS (UFO)*, another gene expressed both in the SAM and  
71 in stage 2 FM (Yoshida et al., 2011; Samach et al., 1999; Wilkinson and Haughn,  
72 1995).

73 In parallel to its development as a meristem, the flower primordium acquires its floral  
74 fate. Several flower meristem identity genes (*LFY*, *APETALA1*, *CAULIFLOWER* and  
75 other MADS-box TF) confer to the nascent FM its flower specific features:  
76 determinate growth, whorled phyllotaxis, whorled pattern of floral organ identity  
77 genes expression (Chandler and Werr, 2014; Kaufmann et al., 2010; Denay et al.,  
78 2017) . Among those, *LFY* is expressed first and throughout floral development. It  
79 acts as a key floral regulator, building on the meristematic pre-patterning defined by  
80 *WUS* or *UFO* to locally induce floral organ identity genes (Laux et al., 1996; Lohmann  
81 et al., 2001; Parcy et al., 1998).

82 How the floral primordium grows and acquires its meristematic organization still  
83 remains elusive (Denay et al., 2017). The proposed mechanisms involve a  
84 combination of growth and hormone signalling (Gruel et al., 2016), but the executive  
85 transcriptional signals remain largely uncharacterized. An efficient way to coordinate  
86 the establishment of the meristematic organization with floral fate acquisition is  
87 probably to couple both processes. *LFY* was proposed to participate in both  
88 (Moyroud et al., 2010) and genetic evidence have indeed accumulated, documenting  
89 its contribution to meristem emergence (Yamaguchi et al., 2013; Wu et al., 2015;  
90 Sawa et al., 1999; Chahtane et al., 2013). This function is particularly obvious in rice  
91 where *LFY* participates in tiller growth and panicle meristem development, and in  
92 legumes where *LFY* triggers compound leaf development; all processes requiring the  
93 acquisition of meristematic features (Moyroud et al., 2010). In *Arabidopsis*, such  
94 function for *LFY* remains cryptic as *lfy* mutants develop lateral structures such as  
95 meristems and leaves, suggesting *LFY* might act redundantly with other pathways  
96 (Moyroud et al., 2010). However, constitutive expression of *LFY* triggers ectopic  
97 flower production in the axils of rosette leaves or cotyledons (Chahtane et al., 2018;  
98 Sayou et al., 2016). This effect on floral meristem production can even be uncoupled  
99 from floral identity by impairing *LFY* dimerization. Expression of a *LFY* variant triggers  
100 the development of precocious or ectopic inflorescence meristems instead of flowers  
101 in the axil of rosette leaves, through the induction of the R2R3 TF REGULATOR OF  
102 AXILLARY MERISTEMS1 (*RAX1*) (Chahtane et al., 2013). Thus, in *Arabidopsis* too,  
103 *LFY* appears to be able to trigger meristem formation. Whether the *LFY*-*RAX1*  
104 module that acts at the axil of rosette leaves is also active in flowers is unknown:  
105 *RAX1* is expressed in flower meristems but *rax1* mutants do not exhibit any floral

106 phenotype (Keller et al., 2006; Müller et al., 2006). Just as for LFY, we surmised that  
107 a role of RAX1 on floral meristem might be masked by redundancy with other  
108 pathways.

109 Such pathways might involve the HD-ZIPIII family of TFs that is linked to *de novo*  
110 meristem formation in aerial tissues. Triple mutants of *revoluta (rev) phabulosa*  
111 *phavoluta* fail to form an embryonic SAM (Prigge et al., 2005) and single *rev* mutants  
112 show pleiotropic defects (Otsuga et al., 2001; Talbert et al., 1995). These defects  
113 include failure to form axillary stems and occasionally flowers, resulting in the  
114 formation of filaments or of flowers similar to those of weak *wus* mutants (Otsuga et  
115 al., 2001; Laux et al., 1996). Additionally, REV was shown recently to be an essential  
116 component of axillary shoot meristem formation by stimulating the expression of *STM*  
117 in the leaf axils and determining adaxial fate in young developing organs (Shi et al.,  
118 2016; Caggiano et al., 2017; Zhang et al., 2018).

119 Because *REV* appears as a possible candidate to act in parallel with the *LFY/RAX1*  
120 pathway in flowers, we combined mutations in both pathways to study their potential  
121 role in the acquisition of the meristematic structure of the flower primordium. We  
122 show that *REV* and the *LFY-RAX1* module control the establishment of meristematic  
123 domains in flowers and that *RAX1* may act in part by repressing *CLV1* expression in  
124 the young flower bud, thereby enabling proper *WUS* expression and meristem  
125 patterning. This work reveals a molecular coupling between the establishment of the  
126 floral meristem structure and the acquisition of its floral identity through the action of  
127 *LFY* in both processes.

## 128 **Results**

### 129 *LFY and REV act in parallel pathways during flower meristem development*

130 To gain insight into the role of *LFY* in early floral meristem development, we analysed  
131 the effect of *lfy* mutations in the *rev* mutant background. As *LFY* and *REV* are  
132 genetically linked, we used CRISPR/Cas9 to target the third and ninth exons of the  
133 *REV* gene (Supplemental Figure 1A) to simplify the isolation of *lfy rev* double  
134 mutants. Several *rev* alleles were recovered in a *pWUS:2xVENUS-NLS:tWUS*  
135 reporter (*pWUS:Venus*; Supplemental Figure 2A), carrying insertions or deletions  
136 leading to premature stop codons in the third exon (Supplemental Figure 1A). These  
137 plants showed similar phenotypes to the previously described *rev-6* mutant allele

138 (Otsuga et al., 2001). One representative line (thereafter named *rev-c1*) was further  
139 characterized: its leaves were slightly over-curved downward, the number of axillary  
140 stems was reduced, 20% of flowers lacked internal whorls, and some rare flowers  
141 were replaced by filaments (Supplemental Figure 3 A,B).

142 We then crossed this line still containing the REV-targeting CRISPR construct into  
143 *lfy-12/+* mutants. In the F2, we observed plants with typical *lfy* and *rev* mutant  
144 aspects as well as plants showing a dramatically enhanced phenotype with nearly all  
145 flowers replaced by small filamentous structures. These plants were clearly distinct  
146 from *rev*-like plants that bear distorted flowers (sometimes lacking the inner whorls)  
147 and from *lfy* mutants that lack flowers but display fully developed lateral structures  
148 (secondary shoots or shoot/flower intermediates) (Figure 1A-D). We selected one  
149 plant with a clear *rev* phenotype that was heterozygous for the *lfy-12* allele, and  
150 which no longer carried the CRISPR construct. Sequencing of *REV* around the site of  
151 Cas9 nuclease activity in this plant revealed a homozygous one base deletion  
152 resulting in a premature stop codon in the third exon of *REV*. This mutation was  
153 called *rev-c4* (Supplemental Figure 1A). Co-segregation analysis after one back-  
154 cross to wild-type showed that the newly observed filamentous phenotype is specific  
155 to *lfy-12 rev-c4* double mutants (Supplemental Table 1).

156 The growth of short determinate filaments instead of flowers suggests that the *lfy-12*  
157 *rev-c4* mutant phenotype might arise from a failure to establish a functional floral  
158 meristem. To test this hypothesis, we analysed the activity of the *pWUS:Venus*  
159 reporter in inflorescences of the *rev-c4* and *lfy-12 rev-c4* mutants (Figure 1E-L). In  
160 wild-type plants, *WUS* expression is detectable from late stage 1 onwards, when the  
161 flower primordium forms a bulge; this expression is, however, very weak and  
162 restricted to only a few cells (Supplemental Figure 2D). At early stage 2, *WUS*  
163 expression is enhanced in the centre of the flower meristem (Supplemental Figure  
164 2E) and absent from the peripheral zone and the L1 layer in almost all observed  
165 flowers (32/33). However, it is strongly expressed in the L2 of flower meristems  
166 (Supplemental Figure 2E) in contrast to the SAM, where *WUS* expression is  
167 restricted to the L3. These observations contrast with some previous reports of *WUS*  
168 promoter activity in the L2 of the SAM and the L1 of FMs (Yadav et al., 2011), but are  
169 in accordance with several independent data obtained by *in situ* hybridization (Yadav  
170 and Reddy, 2012; Mayer et al., 1998; Leibfried et al., 2005). Similar to wild-type

171 plants, the *rev-c4* mutants showed *WUS* expression in flower primordia at stage 2.  
172 However, when combined with the *lfy-12* mutation, the *WUS*-Venus signal was  
173 strongly altered in primordia (Figure 1E-N): more than 50% of the primordia at stage  
174 2 or more advanced stages lacked detectable *WUS* expression (Supplemental Figure  
175 4) and about 20% of the primordia showed *WUS* expression restricted to the axil of  
176 the developing filament (Figure 1I-L, Supplemental Figure 4C).

177 The presence of filaments that fail to establish a floral stem cell niche in the *lfy rev*  
178 double mutant suggests that *REV* and *LFY* act partially redundantly to build a  
179 functional floral meristem. Thus, the *rev* mutant represents a sensitized background  
180 suitable to investigate *LFY*'s molecular function in the formation of the floral stem cell  
181 niche.

### 182 *The LFY target RAX1 contributes to floral meristem development with REV*

183 Next we wondered whether the *LFY*-*RAX1* module acting on axillary meristems  
184 (Chahtane et al., 2013) also participates in FM meristematic organisation. It was  
185 previously shown that *RAX1* mRNA levels in inflorescences are not altered by  
186 mutations in *lfy* but that *RAX1* expression is increased in plants expressing a  
187 constitutively active form of *LFY*, which is derived from a fusion between *LFY* and the  
188 *VP16 trans*-activation domain under the control of *LFY* promoter (*LFY*-*VP16*)  
189 (Chahtane et al., 2013; Parcy et al., 1998). To study the spatial effect of *LFY*-*VP16*,  
190 we compared *RAX1* expression between wild-type plants and plants expressing *LFY*-  
191 *VP16* using both *in situ* hybridisation and a *RAX1:GUS* transcriptional reporter  
192 (Supplemental Figure 5). We found that in the presence of *LFY*-*VP16*, *RAX1*  
193 expression was stronger in early floral meristems and broader in inflorescences,  
194 confirming that *LFY* can promote *RAX1* expression in these tissues.

195 Next, we probed the role of *RAX1* during FM emergence. Since *rax1* mutants have  
196 no floral defects (Keller et al., 2006; Müller et al., 2006), we introduced the *rax1-3*  
197 mutation into the *rev-6* background. In this case, the *rev-6 Ler* allele was  
198 backcrossed 3 times into Col-0. *rev-6* [Col-0] displayed a higher proportion of flowers  
199 either lacking floral organs (63%) or replaced by filaments (27%) (Figure 2I) than  
200 reported for *rev-6* in *Ler* (12% of flowers presenting defects) (Otsuga et al., 2001) or  
201 observed in the *rev-c1* allele described above (20% of flowers lacking internal whorls,  
202 and 1% is replaced by filaments) (Supplemental Figure 3B). The presence of the

203 *rax1-3* mutation considerably enhanced the *rev-6* phenotypes (Figure 2). *rev-6 rax1-3*  
204 plants produced only a few fertile flowers (1 to 2 per plant on average) and the  
205 proportion of filaments was much higher than in *rev-6* (75% of flowers replaced by  
206 filaments and 22% lacking internal whorls). Also, the plants seldom formed axillary  
207 stems (Supplemental Figure 6A-D) and main axis growth was prolonged, resulting in  
208 the formation of an abnormally long main stem.

209 Analysis of *rev-6 rax1-3* inflorescences by scanning electron microscopy revealed  
210 either filaments or 'empty flowers' only made of a whorl of sepals lacking a  
211 meristematic dome (Figure 2 E-H,J-M). Both phenotypes suggested a failure to  
212 establish a flower meristem of adequate size to allow development of all four whorls  
213 of organs. The strong genetic interaction between *rax1* and *rev* mutations was further  
214 illustrated by the following observations: 1) the *rax1-3* mutation behaved semi-  
215 dominant in the *rev-6* background (Supplemental Figure 7): *rev-6 rax1-3/RAX1* plants  
216 displayed for instance less axillary stems than *rev-6* mutants. 2) In short-day  
217 conditions, where the *LFY* pathway is less active (Blázquez et al., 1997), the *rev-6*  
218 phenotype was enhanced, with inflorescences essentially made of filaments  
219 subtended by bract primordia. In these growth conditions, the *rax1-3 rev-6* phenotype  
220 was drastic: filaments were extremely reduced and stipule-like organs became visible  
221 on the flanks of rudimentary bracts (Supplemental Figure 8).

222 In conclusion, although the single *rax1* mutation does not display any flower  
223 phenotype, our results using the *rev-6* background show that *RAX1* and *REV* both  
224 act to regulate development of early flower primordia.

#### 225 *RAX1 and REV are required for FM meristematic structure*

226 The development of flowers lacking internal whorls or of filaments suggested that the  
227 flower meristematic structure is not properly established or maintained in *rax1 rev*  
228 mutants. To characterize possible meristematic defects of these double mutants, we  
229 monitored the expression of the *CLV3* and *WUS* meristem patterning markers using  
230 *in situ* hybridization. Whereas the expression of *CLV3* and *WUS* was not altered in  
231 the SAM, they were strongly reduced or even absent in some *rax1-3 rev-6* "flower"  
232 primordia (Supplemental Figure 9). Other primordia displayed a detectable and  
233 normally localized *WUS* and *CLV3* expression consistent with the fact that *rax1 rev*



234 mutants showed a mixture of severely affected structures (empty flowers or  
235 filaments) as well as some more normal flowers (Figure 2).

236 In order to more finely track the establishment of the floral OC over developmental  
237 time, we introduced CRISPR/Cas9 constructs targeting both *RAX1* and *REV* in the  
238 *pWUS:Venus* reporter line. We validated the isolation of *rax1* and *rev* single mutants  
239 and *rax1 rev* double mutants by phenotypic characterization and genotyping  
240 (Supplemental Figures 1 and 3). We recovered several types of mutations that all  
241 resulted in frameshifts at the same sequence site, which led to stop codons at  
242 different downstream positions (*rev-c2*, *-c3* and *rax1-c1*, *-c2* and *-c3*; Supplemental  
243 Figure 1). For the *rax1 rev* double mutant, we studied the progeny of a double  
244 heteroallelic plant (*rax1-c2/3 rev-c2/3*). In this *rax1-c2/3 rev-c2/3* double mutant, the  
245 *pWUS:Venus* signal was weaker in the first few primordia than in either *rax1-c1* or  
246 *rev-c1* single mutants, but still detectable (Figure 3A-C). However, the main effect of  
247 this mutation combination was an expansion of the *WUS* expression domain in young  
248 flowers. Such ectopic *WUS* expression was observed in only 12% (N=40) of *rax1-c1*  
249 flowers, while single *rev-c1* mutant showed ectopic *WUS* expression in 75% (N=35)  
250 of observed flowers, either restricted to the apical domain of the L1 (44%) or  
251 throughout the L1 (31%). In contrast, double mutants exhibited ectopic *WUS*  
252 expression in almost all observed flowers (95%, N=23), in the apical domain of the L1  
253 and throughout the L1 in 30% and 65% of the flowers, respectively (Figure 3J-L', O).  
254 Additionally, the *WUS* expression domain appeared shifted apically in the *rev-c1*  
255 mutant and to a higher extent in the double mutant where *WUS* expression was  
256 restricted to the topmost 3-5 cell layers, while it reached much deeper layers in *rax1-*  
257 *c1* and WT (Figure 3D-L'). The SAM was also considerably enlarged in double  
258 mutants, however we could not detect any defect in *WUS* expression there (Figure  
259 3A-C and Supplemental Figure 10).

260 Taken together, these data indicated that *REV* and *RAX1* are important regulators  
261 controlling both the level and spatial expression of *WUS* in the centre of emerging  
262 flower primordia. While the contribution of *RAX1* may be hidden due to redundancy in  
263 a single mutant situation, its role became clear when *REV* function was also  
264 compromised: double mutants showed a reduction in *WUS* expression levels  
265 combined with a dramatic expansion of the *WUS* expression domain in the L1 and  
266 the peripheral domains of floral primordia. Since the proportion of flowers showing

267 expression of *WUS* in the peripheral zone was strongly increased in double mutants,  
268 we hypothesised that *RAX1* plays a more specific role in preventing OC expansion in  
269 the peripheral zone while *REV* acts mostly in positioning the OC below the L1. The  
270 defects in OC positioning, and thus FM organization, is likely the cause for the floral  
271 defects observed in these mutants.

### 272 *RAX1 induces WUS expression*

273 To understand how *RAX1* regulates meristem formation, we generated plant lines  
274 expressing a mCherry-*RAX1*-GR (*iRAX1*) fusion protein under the control of the  
275 moderate constitutive *UBQ10* promoter (Geldner et al., 2009). The hormone binding  
276 domain of the glucocorticoid receptor (GR) allows the retention of the fusion protein  
277 in the cytoplasm and its conditional translocation to the nucleus upon  
278 dexamethasone (DEX) treatment (Padidam, 2003). *RAX1* protein expression was  
279 validated by western blot (Supplemental Figure 11I). When *RAX1* activity was  
280 induced over a long period of time by periodic DEX treatments, plants appeared  
281 stunted, retarded in growth and produced very small siliques with only a few seeds.  
282 Mock treated *iRAX1* plants were slightly smaller than a control transgenic line  
283 expressing mCherry-GR fusion proteins (*iMock*), indicating a residual activity of the  
284 construct in the absence of DEX (Supplemental Figure 11A-H).

285 In the *iRAX1* line, we could observe ectopic *WUS* expression in the L1 of young  
286 flowers as early as 6h after DEX treatment in 7 out of 12 plants (Figure 4A), while  
287 control *pWUS:Venus* plants showed normal *WUS* expression up to 24h after DEX  
288 treatment (10 out of 11 plants) (Figure 4B). This indicated that ectopic activation of  
289 *RAX1* transcriptional activity in young flowers could trigger ectopic *WUS* expression  
290 throughout the FM.

### 291 *RAX1 acts on multiple signalling pathways*

292 In order to gain insight into *RAX1* TF molecular function, we examined gene  
293 expression in response to *RAX1* post-transcriptional induction in the *iRAX1* line in  
294 comparison to *iMock*. Paired-end RNA-sequencing analysis was performed on 14-  
295 day-old seedlings expressing the above-mentioned *iRAX1* line or *iMock* mock line, 4h  
296 after DEX or mock treatment, with three biological replicates for each condition,  
297 yielding libraries of 26 to 37 million reads. Principal component analysis of the top  
298 500 variable genes across all datasets showed a clear segregation of the DEX-

299 treated RAX1 inducible line along the first component axis (Figure 5A), indicating a  
300 specific transcriptome response in these samples. We identified 822 differentially  
301 expressed genes (DEG; FDR  $\leq$  0.01, 482 down- and 340 up-regulated) in response  
302 to both the treatment and the presence of RAX1 (Figure 5B, Supplementary Dataset  
303 1). Gene ontology (GO) analysis showed an enrichment of genes involved in cell  
304 modifications and phenylpropanoid synthesis amongst the genes up-regulated. The  
305 down-regulated genes were enriched in genes involved in various immune and  
306 hormone responses (Figure 5C; Supplementary Datasets 2-3).

### 307 *In silico prediction of putative direct RAX1 targets*

308 We aimed at identifying putative direct targets of RAX1 amongst the differentially  
309 expressed genes. For this, we determined RAX1 DNA-binding properties using  
310 protein-binding micro-array (PBM) (Franco-Zorrilla et al., 2014). We used the RAX1  
311 protein fused to Maltose Binding Protein (MBP) and a 6-Histidine tag (RAX1<sub>full</sub>-MBP-  
312 6H) produced recombinantly in *E. coli*. The best motif obtained by PBM matches well  
313 previously described Myb R2R3 motifs (Franco-Zorrilla et al., 2014) (Figure 5D).  
314 Using this DNA-binding model, we determined both the best RAX1 predicted binding  
315 sites (RAX1bs) and the probability of occupancy (pOcc) (Granek and Clarke, 2005)  
316 by RAX1 in the genomic region of each differentially expressed gene. The scores  
317 obtained for RAX1 DNA-binding model ranged from -47.87 (worst possible RAX1bs)  
318 to 14.37 (best RAX1bs). In order to focus on the genes most likely to be direct  
319 targets, we arbitrarily set a score threshold of 12 and a pOcc threshold of 0.2  
320 corresponding to the top 51 and 33 % respectively. Based on these predictions, we  
321 identified 272 genes (out of 822) as best direct targets candidates of RAX1 (Figure  
322 5E, Supplementary Dataset 4). These included a set of genes with experimental  
323 evidence for SAM expression (Yadav et al., 2014, 2009) (Supplemental Table 2).

324 Among the predicted RAX1 direct targets, we identified ABF2, a protein linked to  
325 abscisic acid signalling, confirming previous evidence of ABF2 regulation by RAX1  
326 (Kim et al., 2004; Yu et al., 2016). We also identified the transcription factors  
327 ETHYLENE RESPONSE FACTOR (ERF) 1 and 2, involved in ethylene and  
328 jasmonate signalling, and in pathogen response (Cheng et al., 2013). Numerous cell-  
329 wall remodelling enzymes as well as the two pectin receptors WALL ASSOCIATED  
330 KINASE (WAK) 1 and 2 were also identified, all of which have roles in cell growth  
331 regulation (Goh et al., 2012; Hewezi et al., 2008; Liang et al., 2013; Wu et al., 2010;

332 Wagner and Kohorn, 2001; Kohorn et al., 2006). Finally, high-score RAX1 binding  
333 sites were detected in the *UPBEAT1* (*UPB1*) and *CLV1* genomic regions. *UPB1* is  
334 involved in the control of ROS balance and was shown to control root and shoot  
335 stemness (Tsukagoshi et al., 2010; Zeng et al., 2017). The inhibition of *UPB1* and  
336 *CLV1* observed in response to RAX1 activity suggests that RAX1 may contribute in  
337 stem cell niche maintenance by repressing these genes (Supplemental Table 2).

### 338 *RAX1 directly regulates CLV1 expression*

339 *CLV1*, a known negative regulator of *WUS*, was identified as a putative direct RAX1  
340 target and was repressed over two-fold in seedlings in response to RAX1 induction.  
341 *CLV1* carries two high-score (> 12) RAX1bs in its promoter and coding sequence  
342 (Figure 6A). In order to determine if *CLV1* is a genuine target of RAX1 in the shoot  
343 apex, we analysed *CLV1* expression by qRT-PCR in mock- or DEX-treated *iRAX1*  
344 inflorescences. *CLV1* mRNA levels were mildly reduced in response to DEX  
345 treatment (Figure 6B) and this reduction was still observed in the presence of the  
346 protein synthesis inhibitor cycloheximide (CHX) indicating that this regulation is likely  
347 direct. Consistent with this result, we found that recombinantly produced RAX1<sub>full</sub>-  
348 MBP-6H as well as a tagged truncated version of RAX1 carrying only the Myb  
349 domain (RAX1<sub>myb</sub>-6H) were able to specifically bind oligonucleotides carrying either  
350 the best predicted RAX1bs or the one present in *CLV1* cis-regulatory region (Figure  
351 6C). Taken together, these results indicated that RAX1 most likely binds the *CLV1*  
352 promoter *via* its Myb domain, and is able to reduce *CLV1* expression.

## 353 **Discussion**

### 354 *REV and the LFY-RAX1 module control flower meristem development*

355 Since it was first proposed (Moyroud et al., 2010), several studies suggested that  
356 LFY could also be involved in the establishment of meristematic structures of FMs, in  
357 addition to its well-studied role in flower identity determination (Sawa et al., 1999;  
358 Yamaguchi et al., 2013; Wu et al., 2015; Chahtane et al., 2013; Moyroud et al.,  
359 2010). However, *lfy* mutants do initiate lateral structures on shoots, indicating that  
360 either LFY does not play any role in this process or that other pathways can  
361 compensate for the loss of LFY function. Because *rev* mutants are affected in flower  
362 initiation and meristem formation (Talbert et al., 1995; Otsuga et al., 2001; Prigge et  
363 al., 2005), we used *rev* as a sensitized background to study the role of LFY in FM

364 formation. We found that combinations of *lfy* and *rev* mutations almost completely  
365 abolished the formation of flowers, which were replaced by small filamentous organs.  
366 These structures often lacked proper *WUS* expression, a likely explanation for their  
367 failure to establish floral meristems. These results unambiguously showed that *LFY*  
368 acts in parallel with *REV* in the acquisition of meristematic features in FM.

369 It was proposed earlier that *LFY* ectopically induces meristem formation through the  
370 regulation of *RAX1* (Chahtane et al., 2013). Although *RAX1* is expressed in flower  
371 primordia, *rax1* single mutants do not display any floral phenotype (Keller et al., 2006;  
372 Müller et al., 2006) and it was unclear whether *RAX1* participates in floral meristem  
373 initiation as it does for axillary branches. We show here that *RAX1* is a likely target of  
374 *LFY* in early flowers. This regulation was not detected in *lfy* mutants (Chahtane et al.,  
375 2013) likely because in this background flowers are replaced by shoot/flower  
376 intermediates that express *RAX1* through independent mechanisms, probably similar  
377 to the situation in leaf axils (Guo et al., 2015). When combined with mutations in *rev*,  
378 the loss-of-*rax1* mutations drastically enhanced flower developmental defects and  
379 many flowers were either replaced by filamentous structures or lacked internal organ  
380 whorls. The defects observed in *rax1 rev* mutants were milder than that of *lfy rev*  
381 mutants either because the *rax1* alleles used here contain mutations in the C-  
382 terminal part of the proteins, which can retain some activity, or because *LFY*  
383 regulates additional genes involved in meristem formation such as A-type ARRs  
384 (Chahtane et al., 2013).

#### 385 *Filaments likely result from failed flower meristem establishment*

386 Filaments replacing flowers in *lfy rev* or *rax1 rev* double mutants are structures that  
387 do not differentiate further and seem to have a determinate growth. To characterize  
388 those structures, we monitored the expression of *WUS* and *CLV3* as meristematic  
389 markers for the OC and stem cell zone, respectively. We found that some flowers of  
390 the *rax1-3 rev-6* mutant lacked the expression of both *WUS* and *CLV3* in the first  
391 flower development stages where they normally appear. In weaker mutant contexts  
392 (such as *rax1-c2/3 rev-c2/3*), we observed lower *WUS* expression but shifted  
393 upwards in the L1 and underlying layers, indicating that both *RAX1* and *REV* are  
394 involved in the regulation of *WUS* expression and its exclusion from the L1. However,  
395 *RAX1* specifically prevents *WUS* expression in the flower PZ, including in the L1.  
396 When *RAX1* activity was ectopically induced, *WUS* expression became present

397 throughout the flower primordia. Since *REV* is not expressed in the PZ of flower  
398 primordia (Otsuga et al., 2001), we conclude that *RAX1* likely induces *WUS*  
399 expression independently of *REV*. *RAX1* and *REV* are thus required for *WUS*  
400 activation and the proper definition of the FM domains, and filaments appeared to  
401 result either from loss of primordia meristematic organization leading to the  
402 development of a determinate structure, or from the consumption of the stem-cell  
403 pool, resulting in flowers lacking internal whorls.

404 Altogether these data indicate a role of *RAX1* downstream of *LFY* in parallel to *REV*  
405 to regulate the acquisition or the maintenance of the flower meristem structure.

#### 406 *SAM size is increased when filaments replace flowers*

407 In addition to their role in flower primordia, *LFY/RAX1* and *REV* showed a synergistic  
408 effect on restricting the size of the OC and the SAM. The size of the OC in the double  
409 *rax1 rev* mutants remained proportional to the overall SAM size, in accordance to the  
410 existence of a scaling mechanism linking meristem shape and size to *WUS*  
411 expression (Gruel et al., 2016). A similar role in meristem size regulation was already  
412 described for *FILAMENTOUS FLOWERS (FIL)* and *YABBY3 (YAB3)* (Goldshmidt et  
413 al., 2008). It has been suggested that the enlarged SAM in the *fil yab3* mutants  
414 results from decreased auxin synthesis in filamentous structures replacing flowers,  
415 which causes auxin depletion in the SAM and thereby increases meristem activity  
416 (Shi et al., 2018). The same mechanism could also explain the enlarged SAM  
417 observed here, that would be connected only indirectly to *LFY/RAX1* and *REV*  
418 pathways.

#### 419 *RAX1 regulates a variety of pathways*

420 To gain insights into the molecular mechanisms controlled by *RAX1*, we studied  
421 *RAX1* regulated genes in seedlings, unravelling links between *RAX1* and proteins  
422 involved in cell wall modifications, a step known to be important for FM emergence  
423 (Armezzani et al., 2018; Tucker et al., 2018). Amongst these, we predicted that the  
424 genes encoding the cell wall modifying enzymes *FUCOSYL TRANSFERASE4*  
425 (*FUT4*), *PECTIN METHYLESTERASE3 (PME3)* and *EXPANSIN10 (EXPA10)* and  
426 the pectin receptors *WAK 1* and *2* to be likely direct targets of *RAX1*. All were linked  
427 to cell growth and expansion (Liang et al., 2013; Wu et al., 2010; Hewezi et al., 2008;  
428 Goh et al., 2012; Kohorn et al., 2006; Wagner and Kohorn, 2001). Additionally,

429 members of the WAK family have been linked to the regulation of cell differentiation  
430 (Lally et al., 2001).

431 This analysis also revealed a role of *RAX1* in inhibiting plant defence response. This  
432 seems to be a common feature of floral regulators as it is also observed for the genes  
433 *LFY* and *ANT/AIL6* (Winter et al., 2011; Krizek et al., 2016). Consistently, we  
434 predicted the ethylene receptors ERF1 and 2 as being direct RAX1 targets. The  
435 ERFs can induce both abiotic and biotic defence pathways in response to a variety of  
436 stresses (Cheng et al., 2013). Interestingly, we also detected a role of RAX1 in  
437 regulating ABA and ROS responses which can also be linked to cell differentiation in  
438 the SAM (Wilson et al., 2016). In particular, the ABA response regulator ABF2  
439 (previously proposed to be regulated by RAX1 (Yu et al., 2016)) and the ROS  
440 homeostasis regulator UPB1 are predicted direct RAX1 targets. UPB1 was shown to  
441 regulate the balance of cell proliferation and differentiation in the growing root *via*  
442 control of ROS homeostasis (Tsukagoshi et al., 2010). More recently, UPB1 and  
443 ROS levels were shown to regulate *WUS* expression in the SAM (Zeng et al., 2017).  
444 Surprisingly, we did not detect any enrichment in *CUC2* transcripts upon RAX1  
445 induction. *CUC2* was shown to be a direct target of RAX1 (Tian et al., 2014).  
446 However, *CUC2* is a target for microRNA degradation and therefore its ectopic  
447 accumulation in the tissues used for this analysis may be prevented (Laufs et al.,  
448 2004).

449 The transcriptome analysis yielded a low overlap of targets between RAX1 and REV  
450 (Reinhart et al., 2013), with none clearly related to meristem homeostasis  
451 (Supplemental Table 3). Despite differences in the age and growth conditions of the  
452 samples between these two datasets, it suggests that RAX1 and REV act in different  
453 pathways that can compensate for each other.

#### 454 *RAX1 regulates CLV1 expression*

455 Arguably one of the most interesting targets of RAX1 in the FM homeostasis context  
456 is the plasma membrane receptor CLV1, which acts as a negative regulator of *WUS*,  
457 restricting the size of the OC (Lenhard and Laux, 2003). We confirmed that RAX1  
458 was able to bind *in vitro* to an element from *CLV1* cis-regulatory region. Additionally,  
459 induction of RAX1 activity led to a decrease in *CLV1* transcripts in inflorescences,  
460 even in the presence of the protein synthesis inhibitor cycloheximide. Altogether our

461 data indicate that *RAX1* most likely directly regulates *CLV1* in inflorescences,  
462 providing a direct mechanistic link between *RAX1* and the regulation of meristem  
463 activity. It was shown that *WUS*-mediated repression of *CLV1* fine-tunes its  
464 expression, promoting the adaptation of the *CLV3/WUS* equilibrium (Busch et al.,  
465 2010). A similar mechanism might be leveraged by *RAX1*, prior to the establishment  
466 of the meristem. Fine-tuning of *CLV1* expression during FM emergence would  
467 participate to establish the new stem cell niche and the balance of *CLV3* and *WUS*,  
468 and thus define the different meristematic domains. Failure to do so would not allow a  
469 self-maintaining meristem to emerge and lead to developmental arrest, as observed  
470 in the *rax1 rev* double mutants.

471 This work yielded two apparently contradictory observations: both weak *rax1 rev*  
472 mutants and *RAX1* over-expressers are characterized by ectopic *WUS* expression in  
473 the L1. However, we think they can be reconciled by the fact that *RAX1* represses  
474 *CLV1* expression. When ectopically inducing *RAX1* activity in pre-existing flower  
475 meristems, *CLV1* inhibition allows the invasive expression of *WUS* throughout the  
476 flower. In the *rax1 rev* double mutants, lack of *RAX1* at the very early stages of  
477 primordium formation (stage 1) would lead to a perturbation of the *CLV* pathway, a  
478 likely cause for a slightly decreased *WUS* expression, a shift upwards of the OC and  
479 an overall loss of meristem organization.

480 Recent publications showed that *REV* and other members of the HD-ZIP III family  
481 directly regulate stem cell niche formation by (1) inducing *STM* expression, which  
482 was shown to potentiate stemness partly through activation of CK signalling (Zhang  
483 et al., 2018; Jasinski et al., 2005; Yanai et al., 2005), and (2) binding to the *WUS*  
484 promoter in a complex with B-type ARR s (Zhang et al., 2017a, 2017b). Therefore, we  
485 propose that *REV* and the *LFY/RAX1* module control two synergistic pathways  
486 controlling the establishment of a self-sustaining floral stem-cell niche.

487 Our work shows that the *LFY* and *REV* pathways are essential to establish *WUS* and  
488 *CLV3* expression in floral meristems. How these regulators can be integrated into the  
489 recently proposed model where the floral stem cell niche arise from L1 signals  
490 controlling *WUS* and *CLV3* expression is not straightforward (Gruel et al., 2016).  
491 Since there is no evidence that *LFY/RAX1* or *REV* act downstream of the L1 signals,  
492 we can imagine that they are required to regulate *WUS* level in parallel of the L1  
493 signals. Still, the extension of *WUS* signal in L1 layer in some mutant combinations



494 we generated also suggests a more direct involvement in the action of L1 signal  
495 inhibiting WUS.

#### 496 *Evolutionary perspective*

497 Whereas LFY was initially described for its role during flower development, it is  
498 becoming clearer that LFY ancestral role was to control cell division and apical  
499 growth (Moyroud et al., 2010; Tanahashi et al., 2005). This role is essential in the  
500 moss *Physcomitrella patens* sporophyte first divisions (Tanahashi et al., 2005) and  
501 the fern *Ceratopteris* gametophyte and sporophyte apical cells (Plackett et al., 2018).  
502 As evolution proceeded, LFY could have been co-opted as a flower regulator with the  
503 meristematic function becoming more redundant and cryptic in species such as  
504 Arabidopsis but still obvious in SAM (Zhao et al., 2018; Ahearn et al., 2001), leaves  
505 (Hofer et al., 1997; Wang et al., 2008) and axillary shoot (Rao et al., 2008) of some  
506 species. Because of its trajectory, it is likely that LEAFY has been interacting with  
507 meristematic regulator very early in evolution. Its double role is probably an efficient  
508 way to synchronize growth and identity of floral meristems. It will be interesting in the  
509 future to establish whether the LFY-RAX1 module at work in Arabidopsis flowers also  
510 plays a role in other angiosperms LEAFY related process and to determine the time  
511 of origin of the LFY-RAX1 module.

512

#### 513 **Experimental Procedures**

##### 514 *Plant material and treatments*

515 The *rax1-3*, *rev-6*, and *lfy-12* alleles have been previously described (Müller et al.,  
516 2006; Weigel et al., 1992; Otsuga et al., 2001). *rev-6* mutants (*Ler*) and *rax1-3*  
517 mutants (*Col*) were crossed and the double mutants were backcrossed 3 times to  
518 *Col*. Further work was performed on the progeny of the backcrossed plants. Plants  
519 were cultivated in long-day conditions (16h light) unless specified otherwise. The  
520 *pLFY:LFY-VP16* line was previously described (Parcy et al., 1998). For confocal and  
521 scanning electron microscopy, plants were grown in short-day conditions (8 h of light)  
522 for 6 weeks and transferred to long-day conditions for 2 weeks. Mutants phenotyping  
523 was performed three weeks after bolting. For DEX treatment the plants were sprayed

524 with either 10  $\mu$ M DEX in 1/10 000 DMSO or ethanol or 1/10 000 DMSO or ethanol  
525 (mock) every other day from two weeks on.

### 526 *Reporter constructs*

527 The *pRAX1:GUS* construct contains 2.1 kb of *RAX1* promoter driving GUS  
528 expression. The *pWUS:Venus* construct was generated by combining pGGA003,  
529 pGGB002, 2xVenus, pGGD007, pGGE002 and pGGF003 in PGGZ001 in a single  
530 step GreenGate reaction (Lampropoulos et al., 2013). All constructs were  
531 transformed by the floral dip method (Logemann et al., 2006), several independent  
532 lines were analysed and a representative one was selected for further work.

### 533 *CRISPR constructs*

534 CRISPR spacers were designed using CHOPCHOP (Montague et al., 2014).  
535 Spacers with no predicted off-targets were selected (Supplemental Table 4). Spacers  
536 were cloned in pAtU6-26-v4, *pAtU6-26:gRNA* and *pUBQ10:Cas9:tNOS* expression  
537 cassettes were then combined in pCAMBIA1300 (Yan et al., 2016).

### 538 *RAX1 inducible constructs*

539 *RAX1* cDNA in pDONR221 (DQ446976) was acquired from ABRC. The internal *Bsal*  
540 site was removed by mutagenesis using oGD122 and oGD123 (Supplemental Table  
541 5). The sequence was subsequently amplified with oGD115 and oGD116, which  
542 added the compatible GreenGate overhangs and flanking *Bsal* sites, and was cloned  
543 in pGGC000, producing pGD41. The GR coding sequence was amplified from plants  
544 carrying an APETALA1-GR construct (Wellmer et al., 2006) with oGD109 and  
545 oGD110 to be cloned in pGGC000 to produce pGD38. For the cloning of GR in  
546 pGGD000, a linker sequence was amplified from pGGD001 with oGD118 and  
547 oGD119 and the GR sequence was amplified with oGD110 and oGD111. Both  
548 fragments were cloned with compatible ends in pGGD000 in a single step ligation to  
549 produce pGD39. The Alligator selection cassette (*At2S3:GFP*) was amplified from  
550 pALLIGATOR1 (Bensmihen et al., 2004) with oGD120 and oGD121 and cloned in  
551 pGGF000 to produce pGD43. The construct *pUBQ10:mCHERRY-RAX1-*  
552 *GR:tUBQ10:Alligator* (iRAX1) was produced in a single step GreenGate reaction  
553 with the plasmids pGGZ001, pGGA006, pGGE009, pGD43, pGGB001, pGD41 and  
554 pGD39. The construct *pUBQ10:mCHERRY-GR-NLS:tUBQ10:Alligator* (iMock) was

555 produced with the plasmids pGGZ001, pGGA006, pGGE009, pGGB001, pGD38 and  
556 pGD002. Constructs were transformed in Arabidopsis by the floral dip method  
557 (Logemann et al., 2006) and T1 plants were selected based on seed fluorescence.  
558 Several independent lines were analysed in the T2 generation for mCherry  
559 translocation in the nuclei and phenotypical effects upon DEX treatment. A single line  
560 was selected for further analysis.

#### 561 *RAX1 constructs for in vitro expression*

562 The internal *NcoI* site in RAX1 cDNA was removed by mutagenesis with oGD03 and  
563 oGD04. The resulting sequence was amplified with oGD01 and oGD02 for the  
564 cloning of the full-length sequence and oGD01 and oGD05 for the cloning of the Myb  
565 domain. The latter primers added *NcoI* and *NotI* restriction sites which were used to  
566 transfer the amplicon to the destination plasmid. The full length cDNA was  
567 transferred to pETM41 (Dümmler et al., 2005), which contains the sequence for an  
568 6xHis tag and an MBP tag, producing pGD19. The sequence corresponding to the  
569 Myb domain was transferred to pETM11 (Dümmler et al., 2005), which contains the  
570 sequence for a 6xHis tag, producing pGD14.

#### 571 *Identification and isolation of CRISPR mutants*

572 CRISPR constructs were transformed in *pWUS:VENUS* background by the floral dip  
573 method (Logemann et al., 2006). Several T1 plants were selected based on  
574 Hygromycin resistance. CRISPR-induced mutations were identified in the T2 using  
575 poly-acrylamide gel electrophoresis (PAGE) separation of DNA heteroduplexes (Zhu  
576 et al., 2014). The regions surrounding RAX1 spacers 1 and 2 were amplified with  
577 oGD124 and oGD126, and oGD125 and oGD134 respectively. The regions  
578 surrounding REV spacers 1 and 2 were amplified with oGD127 and oGD129, and  
579 oGD128 and oGD135 respectively. These regions were subcloned in pCR-Blunt  
580 (ThermoFisher) for sequencing. Selected lines for the single mutants in either *RAX1*  
581 or *REV* carried a homozygous mutation (namely *rax1-c1* and *rev-c1*), however the  
582 double mutant line carried heteroallelic mutations at each locus (*rax1-c2/c3 rev-*  
583 *c2/c3*; see Figure S1). Progeny of these plants was used for further characterization.  
584 CRISPR lines targeting *REV* were crossed to *lfy-12* and T2 was screened for double  
585 mutant genotype. A line carrying homozygous mutation at the *REV* loci (*rev-c4*) and  
586 heterozygous *lfy-12* mutation was selected.

587 *Western blotting*

588 mCHERRY expression was detected in seedlings whole extract using the [6G6] anti-  
589 RFP antibody (ChromoTek) at a dilution of 1/1000 and revealed with HRP-coupled  
590 anti-mouse antibody. Western blotting was performed as described previously  
591 (Sayou et al., 2016).

592 *In situ hybridization*

593 Plant samples were harvested shortly after bolting. Older flowers were swiftly  
594 removed, apices were collected in fixative, and *in situ* hybridization was performed as  
595 previously described (Carles et al., 2010). The *RAX1*, *WUS*, and *CLV3* probes were  
596 described in previous studies (Fletcher et al., 1999; Brand et al., 2000; Keller et al.,  
597 2006).

598 *Scanning electron microscopy*

599 Older flowers were removed from the inflorescences. Apices were collected and  
600 swiftly fixed on a stub by carbon tape. A drop of water was added at the base of the  
601 inflorescence and the samples were placed in the FEI Quanta 250 chamber. Imaging  
602 was performed in ESEM mode with a pressure between 700 and 550 Pa and a  
603 temperature of 1°C to 2°C with a tension of 14 kV.

604 *Confocal microscopy and image treatment*

605 Apices were dissected and placed on 2% agarose and cell walls were counter-  
606 stained with FM4-64 or propidium iodide. Cell wall and VENUS signals were recorded  
607 in two separate channels. Imaging was performed on a Zeiss 780 (for the *lfy rev*  
608 mutants) or a Leica SP2 (for the *rax1 rev* mutants) with a 40X Water immersion long-  
609 distance objective. Image treatment was performed with FIJI (Schindelin et al., 2012).  
610 Minimal and maximal values were set to improve signal-to-noise ratio, and are  
611 indicated next to the images. For dexamethasone (DEX) induction, the apices were  
612 placed on apex culture medium (Hamant et al., 2014) containing 1/10 000 DMSO or  
613 ethanol with or without 10 µM DEX. Samples were imaged after 6-24 h of incubation.

614 *RNA sequencing and analysis*

615 14-day-old seedlings grown on MS plates were shortly immersed with a solution  
616 containing 0.03% L-77 Silwett and 1/10 000 DMSO (mock), or 10 µM DEX (DEX).

617 Whole seedlings were harvested 4 h after treatment and immediately flash-frozen in  
618 liquid nitrogen. RNA was extracted with the RNAeasy kit (Qiagen) and DNA was  
619 removed with the TURBO DNA-free kit (Ambion) according to manufacturer's  
620 instructions. Libraries were synthesized with the TruSeq Stranded kit (Illumina) and  
621 paired-end sequencing was performed on an HiSeq2000 (Illumina) at the POPS  
622 platform (IPS2, Paris-Saclay). Adapter sequences were trimmed and duplicated and  
623 low-quality reads were discarded. Mapping was performed on TAIR10 assembly with  
624 HISAT2 (Kim et al., 2015) and mapped reads with a mapping quality score below 30  
625 or mapped at several locations were discarded, resulting in an average of 97% of  
626 uniquely mapped read pairs. Reads mapped to exons or untranslated regions were  
627 counted with HTSeq (Anders et al., 2015). DEG discovery was performed with  
628 EdgeR (Robinson et al., 2010) using a multiparametric GLM model for the interaction  
629 genotype:treatment after TMM normalization (McCarthy et al., 2012; Zhou et al.,  
630 2014; Robinson and Smyth, 2007). Genes were considered differentially expressed if  
631 the likelihood-ratio test FDR was equal or below 0.01. GO-term enrichment analysis  
632 was performed in Araport (Krishnakumar et al., 2015).

### 633 *RAX1 binding-site prediction*

634 PBM was performed as previously described using an MBP tagged full-length RAX1  
635 fusion protein (Franco-Zorrilla and Solano, 2014). Binding sites were predicted using  
636 the Biopython package for python 2.7 (Cock et al., 2009). pOcc was calculated as  
637 described for the GOMER program (Granek and Clarke, 2005). All analyses were  
638 performed on the extended genomic sequence spanning 3 kb upstream to 3 kb  
639 downstream of transcribed regions.

### 640 *qRT-PCR*

641 Shortly after bolting, inflorescences were treated with a drop of solution containing  
642 0.03% L-77 Silwett, 1/10 000 DMSO, and 1/1 000 ethanol (mock), and alternatively  
643 10  $\mu$ M DEX (DEX), 50  $\mu$ M cycloheximide (CHX) or both (DEX+CHX). Older flowers  
644 were dissected and 6 inflorescences per replicate were harvested. RNA was  
645 extracted with the RNAeasy kit (Qiagen). Gene expression was quantified using  
646 AT2G28390 and AT4G34270 as internal reference as they were shown to be stable  
647 across a wide range of conditions (Czechowski et al., 2005). Statistical analysis was

648 performed on the  $\Delta Cq$  values and fold-change was calculated solely for graphical  
649 representation purpose.

#### 650 *In vitro* DNA-binding assay

651 Protein production was performed as previously described (Sayou et al., 2016).  
652 Proteins were purified on nickel-sepharose column in purification buffer (Tris-HCl  
653 20mM; dithiothreitol 1mM; pH7.5) and eluted with 150mM imidazole before dialysis in  
654 purification buffer. Electrophoretic mobility-shift assay was performed as previously  
655 described (Sayou et al., 2016) in binding buffer (Tris-HCl 10 mM; NaCl 50 mM; MgCl<sub>2</sub>  
656 1 mM; 1% glycerol; EDTA 0.5 mM; DTT 1 mM; pH 7.5). Probe sequences are  
657 indicated in Supplemental Table 6.

#### 658 **Accessions**

659 RNA sequencing raw and processed files are available from ArrayExpress (E-MTAB-  
660 7050).

#### 661 **Supplementary Data**

662 Supplemental Figure 1. CRISPR/Cas9-induced mutations in *REV* and *RAX1*.

663 Supplemental Figure 2. Characterization of the *WUS* transcriptional reporter  
664 expression in flower primordia.

665 Supplemental Figure 3. Phenotypic characterization of the *rax1*, *rev* and *rax1 rev*  
666 CRISPR lines.

667 Supplemental Figure 4. Expression of *WUS* in the *rev-c4* and *lfy-12 rev-c4* mutants.

668 Supplemental Figure 5. LFY induces *RAX1* expression in inflorescences.

669 Supplemental Figure 6. Growth habit of *rax1-3*, *rev-6* and double mutant in long-day  
670 inductive conditions.

671 Supplemental Figure 7. Axillary organ formation in *rax1-3 rev-6* F2 population.

672 Supplemental Figure 8. *rax1-3* and *rev-6* mutant phenotype in non-inductive short-day  
673 conditions.

674 Supplemental Figure 9. Abnormal flower primordia in *rax1 rev* lack detectable *WUS*  
675 and *CLV3* transcripts.

676 Supplemental Figure 10. Enlarged shoot apical meristems in the *rax1 rev* mutants.

677 Supplemental Figure 11. Effects of RAX1 activity induction on growth and  
678 development.

679 Supplemental Table 1. Segregation analysis of *lfy-12* and *rev-c4* mutations.  
680 Supplemental Table 2. Non exhaustive list of predicted putative direct RAX1 targets.  
681 Supplemental Table 3. Genes co-regulated by RAX1 and REV.  
682 Supplemental Table 4. CRISPR spacers sequences.  
683 Supplemental Table 5. Primers used in this study.  
684 Supplemental Table 6. EMSA probes used in this study.  
685 Supplementary Dataset 1: List of DEG in response to RAX1 induction  
686 Supplementary Dataset 2: GO term enrichment in DEG  
687 Supplementary Dataset 3: Gene-sorted GO term enrichment  
688 Supplementary Dataset 4: RAX1 best binding score and predicted occupancy in DEG  
689 promoter regions.

## 690 **Author Contributions**

691 DG, TG and PF conceived and design the work. DG, TG, LMM, CH, HS, and LVI  
692 collected and analysed data. WC, FZJM, SR and LJ provided material and/or  
693 expertise essential for this work.

## 694 **Acknowledgments**

695 The authors wish to acknowledge the support of the Electron Microscopy facility of  
696 the ICMG Nanobio – Chemistry Platform and C. Lancelon-Pin in particular. The  
697 POPS transcriptomic platform and L. Soubignou-Taconnat. S. Figuet and D.  
698 Grunwald for shared facilities. K. Kaufmann and W. Yan for sharing plasmids ahead  
699 of publication, E. Delannoy, M-L. Martin-Magniette, P. Das, L. Comai and A. Larrieu  
700 for their inputs on the project. pRAX1:GUS seeds were a generous gift from P.  
701 Doerner. This work was supported by the French National Agency for Research  
702 programs Charmful (ANRBlanc–SVSE2– 2011) and Gral (ANR-10-LABX-49-01). The  
703 platform POPS benefits from the support of the LabEx Saclay Plant Sciences-SPS  
704 (ANR-10-LABX-0040-SPS).

## 705 **References**

706 **Ahearn, K.P., Johnson, H.A., Weigel, D., and Wagner, D.R.** (2001). NFL1, a *Nicotiana*  
707 *tabacum* LEAFY-like gene, controls meristem initiation and floral structure. *Plant Cell*  
708 *Physiol* **42**: 1130–1139.  
709 **Anders, S., Pyl, P.T., and Huber, W.** (2015). HTSeq — a Python framework to work with  
710 high-throughput sequencing data. *Bioinformatics* **31**: 166–169.

- 711 **Armezzani, A. et al.** (2018). Transcriptional induction of cell wall remodelling genes is  
712 coupled to microtubule-driven growth isotropy at the shoot apex in Arabidopsis.  
713 *Development* **145**.
- 714 **Bensmihen, S., To, A., Lambert, G., Kroj, T., Giraudat, J., and Parcy, F.** (2004). Analysis  
715 of an activated ABI5 allele using a new selection method for transgenic Arabidopsis  
716 seeds. *FEBS Lett* **561**: 127–131.
- 717 **Blázquez, M.A., Soowal, L.N., Lee, I., and Weigel, D.** (1997). LEAFY expression and flower  
718 initiation in Arabidopsis. *Development* **124**: 3835–3844.
- 719 **Brand, U., Fletcher, J.C., Hobe, M., Meyerowitz, E.M., and Simon, R.** (2000). Dependence  
720 of stem cell fate in Arabidopsis on a feedback loop regulated by CLV3 activity.  
721 *Science* **289**: 617–619.
- 722 **Brand, U., Grünewald, M., Hobe, M., and Simon, R.** (2002). Regulation of CLV3  
723 expression by two homeobox genes in Arabidopsis. *Plant Physiol* **129**: 565–575.
- 724 **Busch, W. et al.** (2010). Transcriptional control of a plant stem cell niche. *Dev Cell* **18**: 849–  
725 861.
- 726 **Caggiano, M.P., Yu, X., Bhatia, N., Larsson, A., Ram, H., Ohno, C.K., Suppl, P.,  
727 Meyerowitz, E.M., Jönsson, H., and Heisler, M.G.** (2017). Cell type boundaries  
728 organize plant development. *elife* **6**.
- 729 **Carles, C.C., Ha, C.M., Jun, J.H., Fiume, E., and Fletcher, J.C.** (2010). Analyzing shoot  
730 apical meristem development. *Methods Mol Biol* **655**: 105–129.
- 731 **Chahtane, H. et al.** (2013). A variant of LEAFY reveals its capacity to stimulate meristem  
732 development by inducing RAX1. *Plant J* **74**: 678–689.
- 733 **Chahtane, H., Zhang, B., Norberg, M., LeMasson, M., Thévenon, E., Bakó, L., Benlloch,  
734 R., Holmlund, M., Parcy, F., Nilsson, O., and Vachon, G.** (2018). LEAFY activity is  
735 post-transcriptionally regulated by BLADE ON PETIOLE2 and CULLIN3 in  
736 Arabidopsis. *New Phytol* **220**: 579–592.
- 737 **Chandler, J.W. and Werr, W.** (2014). Arabidopsis floral phytomer development: auxin  
738 response relative to biphasic modes of organ initiation. *J Exp Bot* **65**: 3097–3110.
- 739 **Cheng, M.-C., Liao, P.-M., Kuo, W.-W., and Lin, T.-P.** (2013). The Arabidopsis ETHYLENE  
740 RESPONSE FACTOR1 regulates abiotic stress-responsive gene expression by  
741 binding to different cis-acting elements in response to different stress signals. *Plant*  
742 *Physiol* **162**: 1566–1582.
- 743 **Cock, P.J.A., Antao, T., Chang, J.T., Chapman, B.A., Cox, C.J., Dalke, A., Friedberg, I.,  
744 Hamelryck, T., Kauff, F., Wilczynski, B., and de Hoon, M.J.L.** (2009). Biopython:  
745 freely available Python tools for computational molecular biology and bioinformatics.  
746 *Bioinformatics* **25**: 1422–1423.
- 747 **Czechowski, T., Stitt, M., Altmann, T., Udvardi, M.K., and Scheible, W.-R.** (2005).  
748 Genome-wide identification and testing of superior reference genes for transcript  
749 normalization in Arabidopsis. *Plant Physiol* **139**: 5–17.
- 750 **Denay, G., Chahtane, H., Tichtinsky, G., and Parcy, F.** (2017). A flower is born: an  
751 update on Arabidopsis floral meristem formation. *Curr Opin Plant Biol*.



- 752 **Dümmler, A., Lawrence, A.-M., and de Marco, A.** (2005). Simplified screening for the  
753 detection of soluble fusion constructs expressed in *E. coli* using a modular set of  
754 vectors. *Microb Cell Fact* **4**: 34.
- 755 **Endrizzi, K., Moussian, B., Haecker, A., Levin, J.Z., and Laux, T.** (1996). The SHOOT  
756 MERISTEMLESS gene is required for maintenance of undifferentiated cells in  
757 *Arabidopsis* shoot and floral meristems and acts at a different regulatory level than  
758 the meristem genes *WUSCHEL* and *ZWILLE*. *Plant J* **10**: 967–979.
- 759 **Fletcher, J.C., Brand, U., Running, M.P., Simon, R., and Meyerowitz, E.M.** (1999).  
760 Signaling of cell fate decisions by *CLAVATA3* in *Arabidopsis* shoot meristems.  
761 *Science* **283**: 1911–1914.
- 762 **Franco-Zorrilla, J.M., López-Vidriero, I., Carrasco, J.L., Godoy, M., Vera, P., and Solano,**  
763 **R.** (2014). DNA-binding specificities of plant transcription factors and their potential to  
764 define target genes. *Proc Natl Acad Sci U S A* **111**: 2367–2372.
- 765 **Franco-Zorrilla, J.M. and Solano, R.** (2014). High-throughput analysis of protein-DNA  
766 binding affinity. *Methods Mol Biol* **1062**: 697–709.
- 767 **Gaillochet, C., Daum, G., and Lohmann, J.U.** (2015). O cell, where art thou? The  
768 mechanisms of shoot meristem patterning. *Curr Opin Plant Biol* **23**: 91–97.
- 769 **Geldner, N., Dénervaud-Tendon, V., Hyman, D.L., Mayer, U., Stierhof, Y.-D., and Chory,**  
770 **J.** (2009). Rapid, combinatorial analysis of membrane compartments in intact plants  
771 with a multicolor marker set. *Plant J* **59**: 169–178.
- 772 **Goh, H.-H., Sloan, J., Dorca-Fornell, C., and Fleming, A.** (2012). Inducible repression of  
773 multiple expansin genes leads to growth suppression during leaf development. *Plant*  
774 *Physiol* **159**: 1759–1770.
- 775 **Goldshmidt, A., Alvarez, J.P., Bowman, J.L., and Eshed, Y.** (2008). Signals derived from  
776 *YABBY* gene activities in organ primordia regulate growth and partitioning of  
777 *Arabidopsis* shoot apical meristems. *Plant Cell* **20**: 1217–1230.
- 778 **Gordon, S.P., Chickarmane, V.S., Ohno, C., and Meyerowitz, E.M.** (2009). Multiple  
779 feedback loops through cytokinin signaling control stem cell number within the  
780 *Arabidopsis* shoot meristem. *Proc Natl Acad Sci U S A* **106**: 16529–16534.
- 781 **Granek, J.A. and Clarke, N.D.** (2005). Explicit equilibrium modeling of transcription-factor  
782 binding and gene regulation. *Genome Biol* **6**: R87.
- 783 **Gruel, J., Landrein, B., Tarr, P., Schuster, C., Refahi, Y., Sampathkumar, A., Hamant,**  
784 **O., Meyerowitz, E.M., and Jönsson, H.** (2016). An epidermis-driven mechanism  
785 positions and scales stem cell niches in plants. *Science advances* **2**: e1500989.
- 786 **Guo, D., Zhang, J., Wang, X., Han, X., Wei, B., Wang, J., Li, B., Yu, H., Huang, Q., Gu, H.,**  
787 **Qu, L.-J., and Qin, G.** (2015). The *WRKY* transcription factor *WRKY71/EXB1*  
788 controls shoot branching by transcriptionally regulating *RAX* genes in *arabidopsis*.  
789 *Plant Cell* **27**: 3112–3127.
- 790 **Hamant, O., Das, P., and Burian, A.** (2014). Time-lapse imaging of developing meristems  
791 using confocal laser scanning microscope. *Methods Mol Biol* **1080**: 111–119.
- 792 **Hewezi, T., Howe, P., Maier, T.R., Hussey, R.S., Mitchum, M.G., Davis, E.L., and Baum,**  
793 **T.J.** (2008). Cellulose binding protein from the parasitic nematode *Heterodera*

- 794 schachtii interacts with Arabidopsis pectin methylesterase: cooperative cell wall  
795 modification during parasitism. *Plant Cell* **20**: 3080–3093.
- 796 **Hofer, J., Turner, L., Hellens, R., Ambrose, M., Matthews, P., Michael, A., and Ellis, N.**  
797 (1997). UNIFOLIATA regulates leaf and flower morphogenesis in pea. *Curr Biol* **7**:  
798 581–587.
- 799 **Hwang, I. and Sheen, J.** (2001). Two-component circuitry in Arabidopsis cytokinin signal  
800 transduction. *Nature* **413**: 383–389.
- 801 **Jasinski, S., Piazza, P., Craft, J., Hay, A., Woolley, L., Rieu, I., Phillips, A., Hedden, P.,  
802 and Tsiantis, M.** (2005). KNOX action in Arabidopsis is mediated by coordinate  
803 regulation of cytokinin and gibberellin activities. *Curr Biol* **15**: 1560–1565.
- 804 **Kaufmann, K., Wellmer, F., Muiño, J.M., Ferrier, T., Wuest, S.E., Kumar, V., Serrano-  
805 Mislata, A., Madueño, F., Krajewski, P., Meyerowitz, E.M., Angenent, G.C., and  
806 Riechmann, J.L.** (2010). Orchestration of floral initiation by APETALA1. *Science* **328**:  
807 85–89.
- 808 **Keller, T., Abbott, J., Moritz, T., and Doerner, P.** (2006). Arabidopsis REGULATOR OF  
809 AXILLARY MERISTEMS1 controls a leaf axil stem cell niche and modulates  
810 vegetative development. *Plant Cell* **18**: 598–611.
- 811 **Kim, D., Langmead, B., and Salzberg, S.L.** (2015). HISAT: a fast spliced aligner with low  
812 memory requirements. *Nat Methods* **12**: 357–360.
- 813 **Kim, S., Kang, J.-Y., Cho, D.-I., Park, J.H., and Kim, S.Y.** (2004). ABF2, an ABRE-binding  
814 bZIP factor, is an essential component of glucose signaling and its overexpression  
815 affects multiple stress tolerance. *Plant J* **40**: 75–87.
- 816 **Kohorn, B.D., Kobayashi, M., Johansen, S., Riese, J., Huang, L.-F., Koch, K., Fu, S.,  
817 Dotson, A., and Byers, N.** (2006). An Arabidopsis cell wall-associated kinase  
818 required for invertase activity and cell growth. *Plant J* **46**: 307–316.
- 819 **Krishnakumar, V. et al.** (2015). Araport: the Arabidopsis information portal. *Nucleic Acids  
820 Res* **43**: D1003–9.
- 821 **Krizek, B.A., Bequette, C.J., Xu, K., Blakley, I.C., Fu, Z.Q., Stratmann, J., and Loraine,  
822 A.E.** (2016). RNA-Seq links AINTEGUMENTA and AINTEGUMENTA-LIKE6 to cell  
823 wall remodeling and plant defense pathways in Arabidopsis. *Plant Physiol* **171**: 2069–  
824 2084.
- 825 **Lally, D., Ingmire, P., Tong, H.Y., and He, Z.H.** (2001). Antisense expression of a cell wall-  
826 associated protein kinase, WAK4, inhibits cell elongation and alters morphology.  
827 *Plant Cell* **13**: 1317–1331.
- 828 **Lampropoulos, A., Sutikovic, Z., Wenzl, C., Maegele, I., Lohmann, J.U., and Forner, J.**  
829 (2013). GreenGate---a novel, versatile, and efficient cloning system for plant  
830 transgenesis. *PLoS ONE* **8**: e83043.
- 831 **Laufs, P., Peaucelle, A., Morin, H., and Traas, J.** (2004). MicroRNA regulation of the CUC  
832 genes is required for boundary size control in Arabidopsis meristems. *Development*  
833 **131**: 4311–4322.
- 834 **Laux, T., Mayer, K.F., Berger, J., and Jürgens, G.** (1996). The WUSCHEL gene is required  
835 for shoot and floral meristem integrity in Arabidopsis. *Development* **122**: 87–96.

- 836 **Leibfried, A., To, J.P.C., Busch, W., Stehling, S., Kehle, A., Demar, M., Kieber, J.J., and**  
837 **Lohmann, J.U.** (2005). WUSCHEL controls meristem function by direct regulation of  
838 cytokinin-inducible response regulators. *Nature* **438**: 1172–1175.
- 839 **Lenhard, M., Jürgens, G., and Laux, T.** (2002). The WUSCHEL and  
840 SHOOTMERISTEMLESS genes fulfil complementary roles in Arabidopsis shoot  
841 meristem regulation. *Development* **129**: 3195–3206.
- 842 **Lenhard, M. and Laux, T.** (2003). Stem cell homeostasis in the Arabidopsis shoot meristem  
843 is regulated by intercellular movement of CLAVATA3 and its sequestration by  
844 CLAVATA1. *Development* **130**: 3163–3173.
- 845 **Liang, Y., Basu, D., Pattathil, S., Xu, W.-L., Venetos, A., Martin, S.L., Faik, A., Hahn,**  
846 **M.G., and Showalter, A.M.** (2013). Biochemical and physiological characterization of  
847 fut4 and fut6 mutants defective in arabinogalactan-protein fucosylation in Arabidopsis.  
848 *J Exp Bot* **64**: 5537–5551.
- 849 **Logemann, E., Birkenbihl, R.P., Ulker, B., and Somssich, I.E.** (2006). An improved  
850 method for preparing Agrobacterium cells that simplifies the Arabidopsis  
851 transformation protocol. *Plant Methods* **2**: 16.
- 852 **Lohmann, J.U., Hong, R.L., Hobe, M., Busch, M.A., Parcy, F., Simon, R., and Weigel, D.**  
853 (2001). A molecular link between stem cell regulation and floral patterning in  
854 Arabidopsis. *Cell* **105**: 793–803.
- 855 **Mayer, K.F., Schoof, H., Haecker, A., Lenhard, M., Jürgens, G., and Laux, T.** (1998). Role  
856 of WUSCHEL in regulating stem cell fate in the Arabidopsis shoot meristem. *Cell* **95**:  
857 805–815.
- 858 **McCarthy, D.J., Chen, Y., and Smyth, G.K.** (2012). Differential expression analysis of  
859 multifactor RNA-Seq experiments with respect to biological variation. *Nucleic Acids*  
860 *Res* **40**: 4288–4297.
- 861 **Montague, T.G., Cruz, J.M., Gagnon, J.A., Church, G.M., and Valen, E.** (2014).  
862 CHOPCHOP: a CRISPR/Cas9 and TALEN web tool for genome editing. *Nucleic*  
863 *Acids Res* **42**: W401–7.
- 864 **Moyroud, E., Kusters, E., Monniaux, M., Koes, R., and Parcy, F.** (2010). LEAFY  
865 blossoms. *Trends Plant Sci* **15**: 346–352.
- 866 **Moyroud, E., Minguet, E.G., Ott, F., Yant, L., Posé, D., Monniaux, M., Blanchet, S.,**  
867 **Bastien, O., Thévenon, E., Weigel, D., Schmid, M., and Parcy, F.** (2011).  
868 Prediction of regulatory interactions from genome sequences using a biophysical  
869 model for the Arabidopsis LEAFY transcription factor. *Plant Cell* **23**: 1293–1306.
- 870 **Müller, D., Schmitz, G., and Theres, K.** (2006). Blind homologous R2R3 Myb genes control  
871 the pattern of lateral meristem initiation in Arabidopsis. *Plant Cell* **18**: 586–597.
- 872 **Ogawa, M., Shinohara, H., Sakagami, Y., and Matsubayashi, Y.** (2008). Arabidopsis CLV3  
873 peptide directly binds CLV1 ectodomain. *Science* **319**: 294.
- 874 **Otsuga, D., DeGuzman, B., Prigge, M.J., Drews, G.N., and Clark, S.E.** (2001).  
875 REVOLUTA regulates meristem initiation at lateral positions. *Plant J* **25**: 223–236.
- 876 **Padidam, M.** (2003). Chemically regulated gene expression in plants. *Curr Opin Plant Biol* **6**:  
877 169–177.

- 878 **Parcy, F., Nilsson, O., Busch, M.A., Lee, I., and Weigel, D.** (1998). A genetic framework  
879 for floral patterning. *Nature* **395**: 561–566.
- 880 **Plackett, A.R., Conway, S.J., Hewett Hazelton, K.D., Rabbinowitsch, E.H., Langdale,**  
881 **J.A., and Di Stilio, V.S.** (2018). LEAFY maintains apical stem cell activity during  
882 shoot development in the fern *Ceratopteris richardii*. *elife* **7**.
- 883 **Prigge, M.J., Otsuga, D., Alonso, J.M., Ecker, J.R., Drews, G.N., and Clark, S.E.** (2005).  
884 Class III homeodomain-leucine zipper gene family members have overlapping,  
885 antagonistic, and distinct roles in *Arabidopsis* development. *Plant Cell* **17**: 61–76.
- 886 **Rao, N.N., Prasad, K., Kumar, P.R., and Vijayraghavan, U.** (2008). Distinct regulatory role  
887 for RFL, the rice LFY homolog, in determining flowering time and plant architecture.  
888 *Proc Natl Acad Sci U S A* **105**: 3646–3651.
- 889 **Reinhart, B.J., Liu, T., Newell, N.R., Magnani, E., Huang, T., Kerstetter, R., Michaels, S.,**  
890 **and Barton, M.K.** (2013). Establishing a framework for the Ad/abaxial regulatory  
891 network of *Arabidopsis*: ascertaining targets of class III homeodomain leucine zipper  
892 and KANADI regulation. *Plant Cell* **25**: 3228–3249.
- 893 **Robinson, M.D., McCarthy, D.J., and Smyth, G.K.** (2010). edgeR: a Bioconductor package  
894 for differential expression analysis of digital gene expression data. *Bioinformatics* **26**:  
895 139–140.
- 896 **Robinson, M.D. and Smyth, G.K.** (2007). Moderated statistical tests for assessing  
897 differences in tag abundance. *Bioinformatics* **23**: 2881–2887.
- 898 **Sakai, H., Honma, T., Aoyama, T., Sato, S., Kato, T., Tabata, S., and Oka, A.** (2001).  
899 ARR1, a transcription factor for genes immediately responsive to cytokinins. *Science*  
900 **294**: 1519–1521.
- 901 **Samach, A., Klenz, J.E., Kohalmi, S.E., Risseeuw, E., Haughn, G.W., and Crosby, W.L.**  
902 (1999). The UNUSUAL FLORAL ORGANS gene of *Arabidopsis thaliana* is an F-box  
903 protein required for normal patterning and growth in the floral meristem. *Plant J* **20**:  
904 433–445.
- 905 **Sawa, S., Ito, T., Shimura, Y., and Okada, K.** (1999). FILAMENTOUS FLOWER controls  
906 the formation and development of *Arabidopsis* inflorescences and floral meristems.  
907 *Plant Cell* **11**: 69–86.
- 908 **Sayou, C. et al.** (2016). A SAM oligomerization domain shapes the genomic binding  
909 landscape of the LEAFY transcription factor. *Nat Commun* **7**: 11222.
- 910 **Schindelin, J. et al.** (2012). Fiji: an open-source platform for biological-image analysis. *Nat*  
911 *Methods* **9**: 676–682.
- 912 **Schoof, H., Lenhard, M., Haecker, A., Mayer, K.F., Jürgens, G., and Laux, T.** (2000). The  
913 stem cell population of *Arabidopsis* shoot meristems is maintained by a regulatory  
914 loop between the CLAVATA and WUSCHEL genes. *Cell* **100**: 635–644.
- 915 **Shi, B. et al.** (2016). Two-Step Regulation of a Meristematic Cell Population Acting in Shoot  
916 Branching in *Arabidopsis*. *PLoS Genet* **12**: e1006168.
- 917 **Shi, B., Guo, X., Wang, Y., Xiong, Y., Wang, J., Hayashi, K.-I., Lei, J., Zhang, L., and**  
918 **Jiao, Y.** (2018). Feedback from Lateral Organs Controls Shoot Apical Meristem  
919 Growth by Modulating Auxin Transport. *Dev Cell* **44**: 204–216.e6.

- 920 **Talbert, P.B., Adler, H.T., Parks, D.W., and Comai, L.** (1995). The REVOLUTA gene is  
921 necessary for apical meristem development and for limiting cell divisions in the leaves  
922 and stems of *Arabidopsis thaliana*. *Development* **121**: 2723–2735.
- 923 **Tanahashi, T., Sumikawa, N., Kato, M., and Hasebe, M.** (2005). Diversification of gene  
924 function: homologs of the floral regulator FLO/LFY control the first zygotic cell division  
925 in the moss *Physcomitrella patens*. *Development* **132**: 1727–1736.
- 926 **Tian, C. et al.** (2014). An organ boundary-enriched gene regulatory network uncovers  
927 regulatory hierarchies underlying axillary meristem initiation. *Mol Syst Biol* **10**: 755.
- 928 **Tsukagoshi, H., Busch, W., and Benfey, P.N.** (2010). Transcriptional regulation of ROS  
929 controls transition from proliferation to differentiation in the root. *Cell* **143**: 606–616.
- 930 **Tucker, M.R., Lou, H., Aubert, M.K., Wilkinson, L.G., Little, A., Houston, K., Pinto, S.C.,  
931 and Shirley, N.J.** (2018). Exploring the Role of Cell Wall-Related Genes and  
932 Polysaccharides during Plant Development. *Plants* **7**.
- 933 **Wagner, T.A. and Kohorn, B.D.** (2001). Wall-associated kinases are expressed throughout  
934 plant development and are required for cell expansion. *Plant Cell* **13**: 303–318.
- 935 **Wang, H., Chen, J., Wen, J., Tadege, M., Li, G., Liu, Y., Mysore, K.S., Ratet, P., and  
936 Chen, R.** (2008). Control of compound leaf development by FLORICAULA/LEAFY  
937 ortholog SINGLE LEAFLET1 in *Medicago truncatula*. *Plant Physiol* **146**: 1759–1772.
- 938 **Weigel, D., Alvarez, J., Smyth, D.R., Yanofsky, M.F., and Meyerowitz, E.M.** (1992).  
939 LEAFY controls floral meristem identity in *Arabidopsis*. *Cell* **69**: 843–859.
- 940 **Wellmer, F., Alves-Ferreira, M., Dubois, A., Riechmann, J.L., and Meyerowitz, E.M.**  
941 (2006). Genome-wide analysis of gene expression during early *Arabidopsis* flower  
942 development. *PLoS Genet* **2**: e117.
- 943 **Wilkinson, M.D. and Haughn, G.W.** (1995). UNUSUAL FLORAL ORGANS controls  
944 meristem identity and organ primordia fate in *arabidopsis*. *Plant Cell* **7**: 1485–1499.
- 945 **Wilson, M.E., Mixdorf, M., Berg, R.H., and Haswell, E.S.** (2016). Plastid osmotic stress  
946 influences cell differentiation at the plant shoot apex. *Development* **143**: 3382–3393.
- 947 **Winter, C.M. et al.** (2011). LEAFY target genes reveal floral regulatory logic, cis motifs, and  
948 a link to biotic stimulus response. *Dev Cell* **20**: 430–443.
- 949 **Wu, M.-F., Yamaguchi, N., Xiao, J., Bargmann, B., Estelle, M., Sang, Y., and Wagner, D.**  
950 (2015). Auxin-regulated chromatin switch directs acquisition of flower primordium  
951 founder fate. *elife* **4**: e09269.
- 952 **Wu, Y., Williams, M., Bernard, S., Driouich, A., Showalter, A.M., and Faik, A.** (2010).  
953 Functional identification of two nonredundant *Arabidopsis*  
954 alpha(1,2)fucosyltransferases specific to arabinogalactan proteins. *J Biol Chem* **285**:  
955 13638–13645.
- 956 **Yadav, R.K., Girke, T., Pasala, S., Xie, M., and Reddy, G.V.** (2009). Gene expression map  
957 of the *Arabidopsis* shoot apical meristem stem cell niche. *Proc Natl Acad Sci U S A*  
958 **106**: 4941–4946.
- 959 **Yadav, R.K., Perales, M., Gruel, J., Girke, T., Jönsson, H., and Reddy, G.V.** (2011).  
960 WUSCHEL protein movement mediates stem cell homeostasis in the *Arabidopsis*  
961 shoot apex. *Genes Dev* **25**: 2025–2030.

- 962 **Yadav, R.K., Perales, M., Gruel, J., Ohno, C., Heisler, M., Girke, T., Jönsson, H., and**  
963 **Reddy, G.V.** (2013). Plant stem cell maintenance involves direct transcriptional  
964 repression of differentiation program. *Mol Syst Biol* **9**: 654.
- 965 **Yadav, R.K. and Reddy, G.V.** (2012). WUSCHEL protein movement and stem cell  
966 homeostasis. *Plant Signal Behav* **7**: 592–594.
- 967 **Yadav, R.K., Tavakkoli, M., and Reddy, G.V.** (2010). WUSCHEL mediates stem cell  
968 homeostasis by regulating stem cell number and patterns of cell division and  
969 differentiation of stem cell progenitors. *Development* **137**: 3581–3589.
- 970 **Yadav, R.K., Tavakkoli, M., Xie, M., Girke, T., and Reddy, G.V.** (2014). A high-resolution  
971 gene expression map of the Arabidopsis shoot meristem stem cell niche.  
972 *Development* **141**: 2735–2744.
- 973 **Yamaguchi, N., Wu, M.-F., Winter, C.M., Berns, M.C., Nole-Wilson, S., Yamaguchi, A.,**  
974 **Coupland, G., Krizek, B.A., and Wagner, D.** (2013). A molecular framework for  
975 auxin-mediated initiation of flower primordia. *Dev Cell* **24**: 271–282.
- 976 **Yan, W., Chen, D., and Kaufmann, K.** (2016). Efficient multiplex mutagenesis by RNA-  
977 guided Cas9 and its use in the characterization of regulatory elements in the  
978 AGAMOUS gene. *Plant Methods* **12**: 23.
- 979 **Yanai, O., Shani, E., Dolezal, K., Tarkowski, P., Sablowski, R., Sandberg, G., Samach,**  
980 **A., and Ori, N.** (2005). Arabidopsis KNOX1 proteins activate cytokinin biosynthesis.  
981 *Curr Biol* **15**: 1566–1571.
- 982 **Yoshida, S., Mandel, T., and Kuhlemeier, C.** (2011). Stem cell activation by light guides  
983 plant organogenesis. *Genes Dev* **25**: 1439–1450.
- 984 **Yu, Y.-T., Wu, Z., Lu, K., Bi, C., Liang, S., Wang, X.-F., and Zhang, D.-P.** (2016).  
985 Overexpression of the MYB37 transcription factor enhances abscisic acid sensitivity,  
986 and improves both drought tolerance and seed productivity in Arabidopsis thaliana.  
987 *Plant Mol Biol* **90**: 267–279.
- 988 **Zeng, J., Dong, Z., Wu, H., Tian, Z., and Zhao, Z.** (2017). Redox regulation of plant stem  
989 cell fate. *EMBO J* **36**: 2844–2855.
- 990 **Zhang, C., Wang, J., Wenkel, S., Chandler, J.W., Werr, W., and Jiao, Y.** (2018).  
991 Spatiotemporal control of axillary meristem formation by interacting transcriptional  
992 regulators. *Development*.
- 993 **Zhang, T.-Q., Lian, H., Zhou, C.-M., Xu, L., Jiao, Y., and Wang, J.-W.** (2017a). A Two-Step  
994 Model for de Novo Activation of WUSCHEL during Plant Shoot Regeneration. *Plant*  
995 *Cell* **29**: 1073–1087.
- 996 **Zhang, Z., Tucker, E., Hermann, M., and Laux, T.** (2017b). A molecular framework for the  
997 embryonic initiation of shoot meristem stem cells. *Dev Cell* **40**: 264–277.e4.
- 998 **Zhao, W., Chen, Z., Liu, X., Che, G., Gu, R., Zhao, J., Wang, Z., Hou, Y., and Zhang, X.**  
999 (2018). CsLFY is required for shoot meristem maintenance via interaction with  
1000 WUSCHEL in cucumber (*Cucumis sativus*). *New Phytol* **218**: 344–356.
- 1001 **Zhao, Z., Andersen, S.U., Ljung, K., Dolezal, K., Miotk, A., Schultheiss, S.J., and**  
1002 **Lohmann, J.U.** (2010). Hormonal control of the shoot stem-cell niche. *Nature* **465**:  
1003 1089–1092.

1004 **Zhou, X., Lindsay, H., and Robinson, M.D.** (2014). Robustly detecting differential  
1005 expression in RNA sequencing data using observation weights. *Nucleic Acids Res*  
1006 **42**: e91.

1007 **Zhu, X. et al.** (2014). An efficient genotyping method for genome-modified animals and  
1008 human cells generated with CRISPR/Cas9 system. *Sci Rep* **4**: 6420.

1009

1010

1011 **Figure Legends**

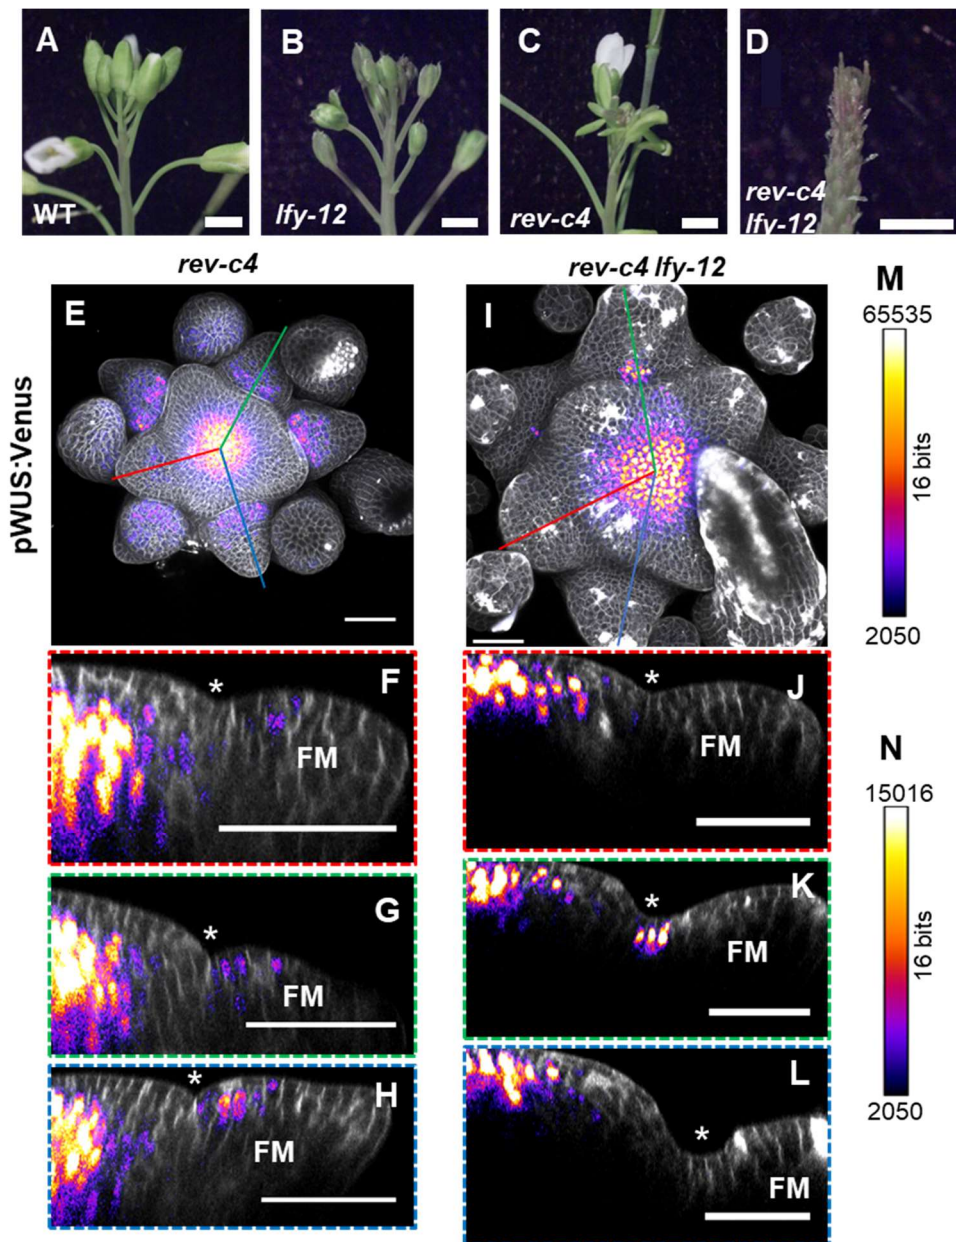

1012

1013 **Figure 1. LFY and REV control floral meristem establishment.**

1014 (A-D) Inflorescences of WT (A; *pWUS:Venus*), *lfy-12* (B), *rev-c4* (C) and *rev-c4 lfy-12* (D)  
1015 mutants. Flowers of the double mutant are almost entirely replaced by filaments. Scale bar: 1  
1016 mm. (E-H) Maximum intensity projection (E, I) and orthogonal cross-sections (F-H, J-L) of  
1017 confocal z-stacks of wild-type (E-H) and *rev-c4 lfy-12* (I-L) inflorescence meristems  
1018 expressing the *pWUS:Venus* reporter. The color frames around the cross-sections  
1019 correspond to the position of the identically colored lines on the projected stacks. The stars  
1020 indicate the position of the organ axil. Grey: cell-wall staining (propidium iodide), fire  
1021 heatmap: Venus signal. Scale bars: 50 μm. (M) Intensity heatmap scale for (E,I). (N) Intensity  
1022 heatmap scale for (F-H, J-L).



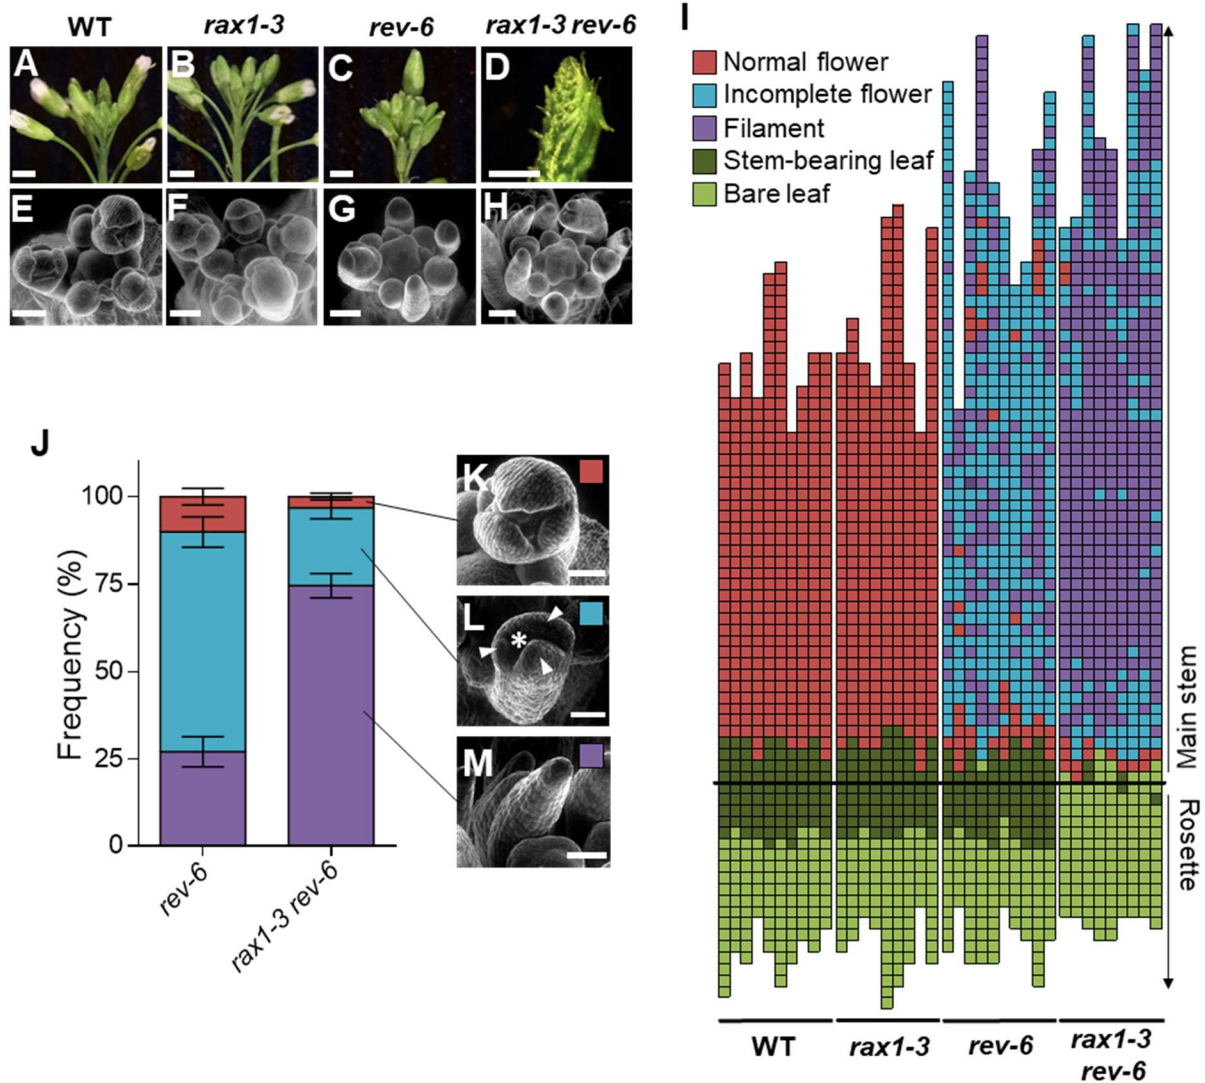

1023

1024 **Figure 2. RAX1 and REV act together to control flower initiation.**

1025 (A-H) Inflorescences of WT (A,E), *rax1-3* (B,F), *rev-6* (C,G) and *rax1-3 rev-6* (D,H) plants,  
 1026 observed by light (A-D; scale bar: 2 mm) or scanning electron microscopy (E-H; scale bar:  
 1027 100  $\mu$ m). (I) Plant architecture diagram of WT (Col-0), *rax1-3* and *rev-6* single and double  
 1028 mutants three weeks after bolting. Each column represents an individual plant and each  
 1029 square represents a single internode. Squares below the thick black line represent  
 1030 internodes on the rosette and squares above the thick black line, internodes on the main  
 1031 stem. Structures initiated are color-coded. Dark green: leaf and axillary stem; light green: leaf  
 1032 lacking the axillary stem; red: wild-type flower; blue: flower lacking one or more internal  
 1033 whorls; purple: filamentous structure. (J) Proportion of floral structures initiated in *rev-6* and  
 1034 *rax1-3 rev-6* mutants (N  $\geq$  9). Close up of the scored structures is shown on the right. Red:  
 1035 normal flower (K), blue: incomplete flower lacking a meristematic dome (star) between  
 1036 developing sepals (arrowheads) (L), violet: filament (M). Scale bar: 100  $\mu$ m.

1037

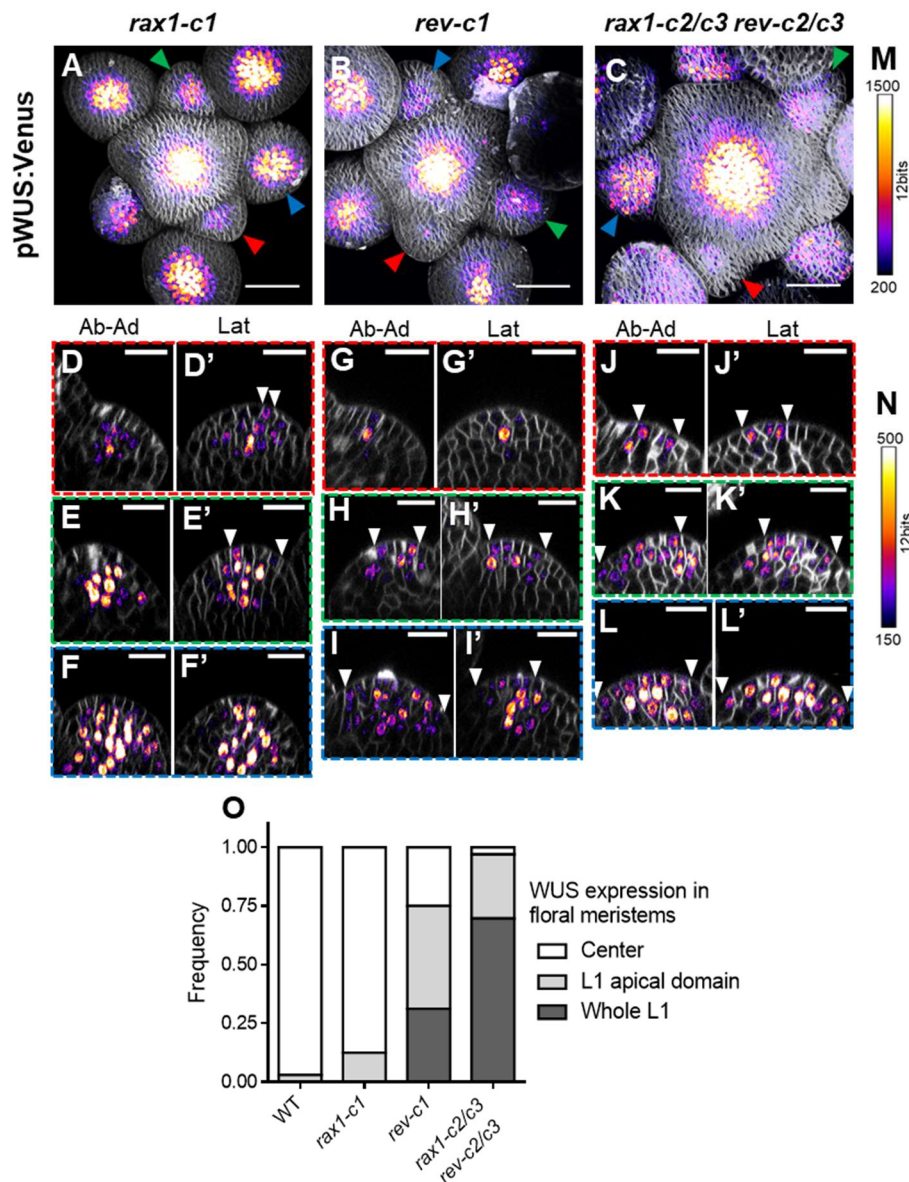

1038

1039 **Figure 3. RAX1 and REV establish flower meristem organization.**

1040 (A-C) Maximum intensity projection of confocal z-stacks of *rax1-c1* (A), *rev-c1* (B) and *rax1-*  
 1041 *c2/c3 rev-c2/c3* (C) inflorescences expressing the *pWUS:Venus* reporter. Grey: cell-wall  
 1042 staining (FM4-64), fire heatmap: Venus signal. Scale bars: 50  $\mu$ m. Color arrowheads indicate

1043 the position of the primordia cross-sections (D-L') with identically colored color-frames. (D-L')  
 1044 Orthogonal sections through flower primordia across the abaxial-adaxial (left) and lateral  
 1045 (right) axes of the *rax1-c1* (D-F'), *rev-c1* (G-I') and *rax1-c2/3 rev-c2/3* (J-L') plants. White

1046 arrowheads mark the limits of *WUS* expression in the L1. Grey: cell-wall staining (FM4-64),  
 1047 fire heatmap: Venus signal. Scale bars: 20  $\mu$ m. (M) Intensity heatmap scale for (A-C). (N)

1048 Intensity heatmap scale for (D-L'). (O) Frequency of flower primordia expressing *WUS* in the  
 1049 central domain only (white), the apical domain of the L1 (light grey), or throughout the L1  
 1050 (dark grey). N  $\geq$  23.

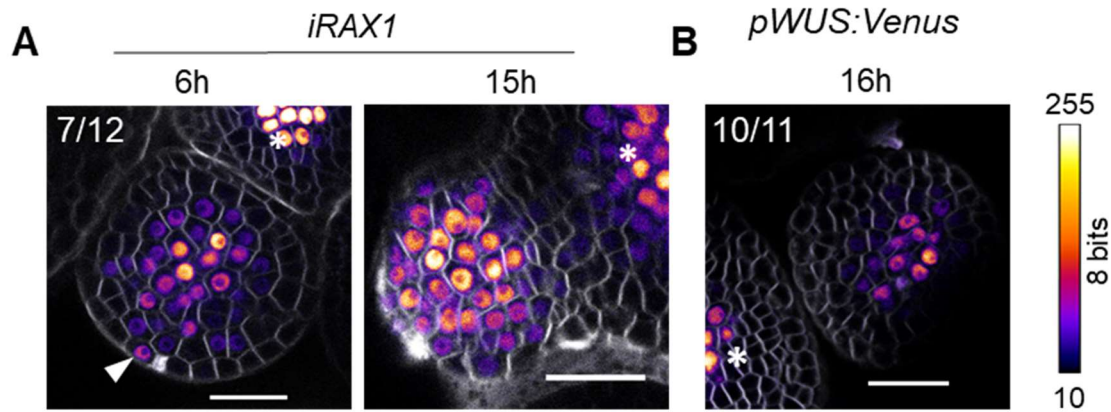

1051

1052 **Figure 4. RAX1 induction leads to activation of *WUS* expression.**

1053 Transverse sections through young flower primordia of *iRAX1i* (A) or wild-type (B) plants  
1054 carrying the *pWUS:Venus* transgene after DEX treatment. Arrowhead indicates ectopic *WUS*  
1055 expression in the L1. Stars indicate the position of the SAM. Grey: cell-wall staining (FM4-  
1056 64), fire heatmap: Venus signal. Scale bars: 20  $\mu$ m.

1057

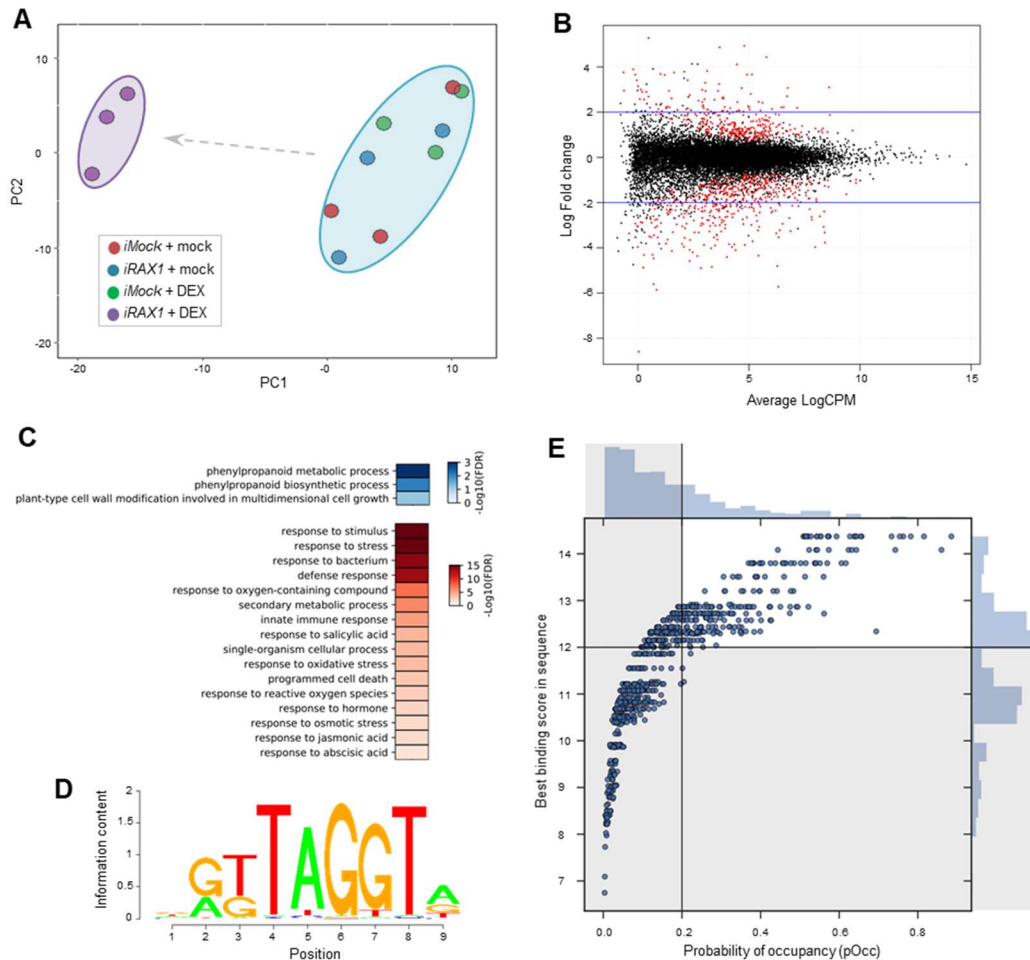

1058

1059 **Figure 5. Identification of RAX1 target genes.**

1060 (A) Principal component analysis of the 500 differentially expressed genes with the highest  
 1061 variance across samples, separated along the two principal components (PC1 and PC2).  
 1062 The non-induced samples (Mock-treated *iRAX1* (blue) and *iMock* (Red) or DEX-treated  
 1063 *iMock* (Green)) segregate together (blue cloud), while the induced RAX1 samples (DEX-  
 1064 treated *iRAX1* (Violet)) are clearly separated. (B) Identification of differentially expressed  
 1065 genes by RNA-seq. The average Log of count per million read (logCPM) is plotted against  
 1066 the Log fold-change (logFC) value across samples for the interaction of genotype:treatment.  
 1067 Differentially expressed genes are indicated in red (FDR  $\leq$  0.01). (C) Enriched gene-ontology  
 1068 terms amongst up-regulated (blue) and down-regulated (red) genes. FDR  $\leq$  0.05. (D) DNA-  
 1069 binding model of RAX1 as determined by protein-binding microarray. Letter size indicates the  
 1070 information content at each position of the motif. (E) Identification of potential direct targets of  
 1071 RAX1. The probability of occupancy (pOcc) of RAX1 on each targets genomic sequence is  
 1072 plotted against the best binding score for RAX1 within this sequence. Distribution histograms  
 1073 of the pOcc (top) and best binding score (right) are represented. Targets were selected using  
 1074 a pOcc threshold of 0.2 and a binding score threshold of 12 (bold lines). The other  
 1075 sequences (greyed area) were not considered as potential direct targets.

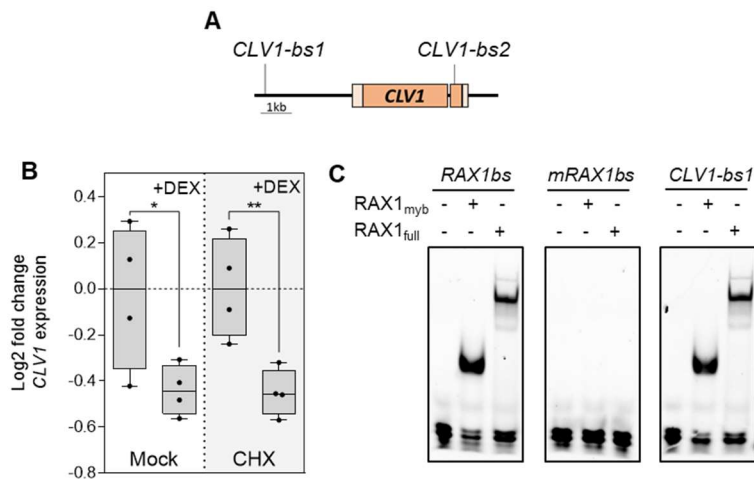

1076

1077 **Figure 6. CLV1 is a direct target of RAX1.**

1078 (A) Scheme of *CLV1* genomic locus with the two best RAX1 predicted binding site (*CLV1-*

1079 *bs1* and *CLV1-bs2*). Untranscribed regions and introns are indicated by a black line, exons  
1080 and 5' and 3' UTR are indicated as dark and light orange boxes respectively. (B)

1081 Quantification of *CLV1* transcripts in *iRAX1* inflorescences treated with mock,

1082 dexamethasone (DEX), cycloheximide (CHX) and CHX + DEX. \*  $p < 0.05$ , \*\*  $p < 0.01$ ,

1083 determined by Student's t-test (N = 4). Each point represents a single biological replicate. (C)

1084 *In vitro* binding assay of RAX1<sub>full</sub> and RAX1<sub>myb</sub> on sequences from *CLV1* genomic region

1085 (*CLV1-bs1*), the best possible RAX1 binding site according to the DNA-binding model

1086 (*RAX1bs*) and a mutated version of this binding site (*mRAX1bs*).

1087
